# Supplementary material for: Palladium-catalyzed cocyclotrimerization of arynes with a pyramidalized alkene
Source: Royal Society of Chemistry journal article supplement (doi:10.1039/c8cc03188f), 2018-01-01
Supplement: c8cc03188f1.pdf [file c8cc03188f1.pdf]

## **SUPPORTING INFORMATION**

### **Palladium-catalyzed Cocyclotrimerization of Arynes with a Pyramidalized Alkene**

José M. Alonso, Sabela Quiroga, Sandra Codony, Andreea L. Turcu, Marta Barniol-Xicota, Dolores Pérez, Enrique Guitián, Santiago Vázquez, and Diego Peña\*

## CONTENTS

|                                              |     |
|----------------------------------------------|-----|
| 1) GENERAL METHODS                           | S3  |
| 2) EXPERIMENTAL PROCEDURES AND DATA          | S4  |
| 3) ATTEMPTS WITH OTHER PYRAMIDALIZED ALKENES | S9  |
| 4) REFERENCES                                | S10 |
| 5) NMR SPECTRA                               | S11 |
| 6) X-RAY DIFFRACTION DATA                    | S16 |

## 1) GENERAL METHODS

All reactions were carried out under argon atmosphere using oven-dried glassware. Solvents were dried by distillation from a drying agent. Commercial reagents were purchased from ABCR GmbH, Aldrich Chemical Co., or Stream Chemicals Inc, and were used without any further purification. *n*-BuLi was used from solution in hexanes (2.40 M). Flash chromatography was performed on Merck silica gel 60 F254. <sup>1</sup>H and <sup>13</sup>C NMR spectra were recorded at 300, 400 and 500 MHz (Varian Mercury instrument). Every experiment was performed at 298 K unless otherwise indicated. Low resolution electron impact mass spectra (EI-LRMS) were determined at 70 eV on a HP-5988A instrument. High resolution mass spectra (HRMS) were obtained on a Micromass Autoespec spectrometer.

## 2) EXPERIMENTAL PROCEDURES AND DATA

### Synthesis of starting materials **1**, **11**, **15**, **16**, **19** and **20**

Diiodoalkane **1** was prepared following a modification of a reported procedure.<sup>1</sup>

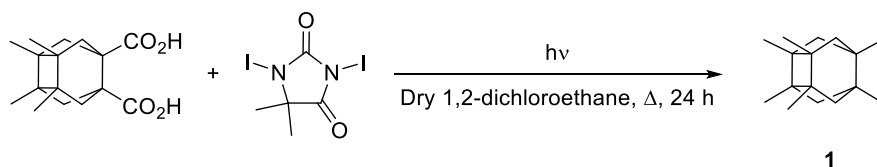

Scheme S1

To a solution of 3,4,8,9-tetramethyltetracyclo[4.4.0.0<sup>3,9</sup>.0<sup>4,8</sup>]decane-1,6-dicarboxylic acid (374 mg, 1.34 mmol) in dry 1,2-dichloroethane (20 mL) was added 1,3-diiodo-5,5-dimethylhydantoin (1.42, 3.74 mmol). The resulting orange solution was irradiated (2 x 60 W tungsten bulb) at reflux for 22 h. The suspension was cooled to room temperature and filtered. The solid was washed with dichloromethane (2 x 10 mL). The combined filtrate and washings were washed with 10% aqueous solution of NaHSO<sub>3</sub> (3 x 10 mL). The organic layer was washed with 2 N NaOH (1 x 10 mL), dried over Na<sub>2</sub>SO<sub>4</sub>, filtered and concentrated under vacuum to obtain 557 mg of a yellow mixture of starting **1** and some anhydride derived from **1**. Purification by column chromatography (silica gel, *n*-hexane/ethyl acetate) gave **1** (eluted with *n*-hexane) as an off-white solid (235 mg, 40% yield). Further elution with *n*-hexane/ethyl acetate 95/5 furnished anhydride of the starting dicarboxylic acid (60 mg).

Aryne precursors **11**, **15**, **16**, **19** and **20** were prepared following previously reported procedures.<sup>2</sup>

### General procedure for cocyclootrimerization of arynes and a pyramidalized alkene

#### Synthesis of adduct **8**

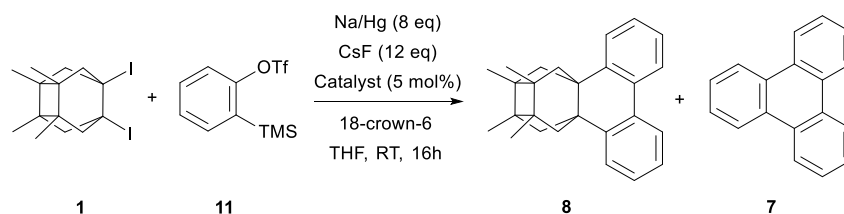

Scheme S2

Compound **1** (20 mg, 0.045 mmol), Na/Hg (5% Na, 168 mg, 0.361 mmol), CsF (84 mg, 0.552 mmol), 18-Crown-6 (73 mg, 0.276 mmol), and Pd(PPh<sub>3</sub>)<sub>4</sub> (15 mg, 0.013 mmol) were placed in an oven-dried shlenck under Ar atmosphere. Then, solution of **11** (83 mg, 0.276 mmol) in THF (4 mL) was added. The mixture was stirred at room temperature for 16h. After that time, the reaction mixture was filtrated through a celite plug, and purified on column chromatography (hexanes) to yield **8** as a white solid (12 mg, 79%). Triphenylene (**7**)<sup>3</sup> was isolated as byproduct (42 mg, 67% from precursor **11**) Crystallization from slow diffusion of hexane in chloroform afforded **8** as colorless crystals.

Data for compound **8**: <sup>1</sup>H NMR (CDCl<sub>3</sub>, 300 MHz): δ 1.05 (12H, s, Me), 1.26 (4H, d, *J* = 11.8 Hz, CH<sub>2</sub>), 2.24 (4H, d, *J* = 11.8 Hz, CH<sub>2</sub>), 7.21 (4H, m, CH Ar), 7.22 (2H, m, CH Ar), 7.94 (2H, m, CH Ar). <sup>13</sup>C NMR (CDCl<sub>3</sub>, 75 MHz): δ 15.6 (4C, Me), 44.8 (2C, C), 45.8 (4C, C), 50.1 (4C, CH<sub>2</sub>), 122.2 (2C, CH Ar), 125.9 (2C, CH Ar), 127.3 (2C, CH Ar), 127.6 (2C, CH Ar), 130.9 (2C, C Ar), 139.6 (2C, C Ar). EM (EI+), *m/z* (%): 340 (M<sup>+</sup>, 10). HRMS: for C<sub>26</sub>H<sub>28</sub> calculated 340,2129, observed 340,2201. M. P. 249.2-252.0 °C.

### Synthesis of adduct **17**

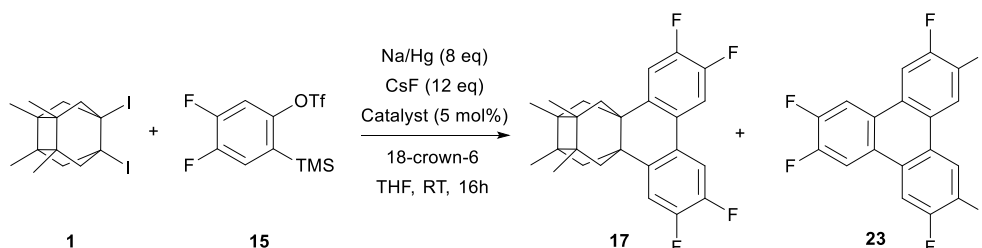

Scheme S3

Compound **1** (20 mg, 0.045 mmol), Na/Hg (5% Na, 164 mg, 0.361 mmol), CsF (84 mg, 0.552 mmol), 18-Crown-6 (73 mg, 0.276 mmol), and Pd(PPh<sub>3</sub>)<sub>4</sub> (15 mg, 0.013 mmol) were placed in an oven-dried shlenck under Ar atmosphere. Then, solution of **15** (92 mg, 0.276 mmol) in THF (4.5 mL) was added. The mixture was stirred at room temperature for 16h. After that time, the reaction mixture was filtrated through a celite plug, and purified on column chromatography (hexane) to yield **17** as a white solid (10 mg, 53%). Hexafluorotriphenylene **23**<sup>4</sup> was isolated as byproduct (8 mg, 9% from precursor **15**).

Data for compound **17**: <sup>1</sup>H NMR (CDCl<sub>3</sub>, 300 MHz): δ 1.04 (12H, s, Me), 1.12 (4H, d, *J* = 12.0 Hz, CH<sub>2</sub>), 2.22 (4H, d, *J* = 11.8 Hz, CH<sub>2</sub>), 7.09 (2H, dd, *J* = 12.4, 8.3 Hz, CH Ar), 7.45 (2H, dd, *J* = 12.3, 8.1 Hz, CH Ar). <sup>13</sup>C NMR (CDCl<sub>3</sub>, 75 MHz): δ 15.65 (4C, Me), 44.73 (2C, C), 45.94 (4C, C), 50.28 (4C, CH<sub>2</sub>), 111.13 (2C, d, *J* = 18.3 Hz, CH Ar), 116.26 (2C, d, *J* = 17.5 Hz, CH Ar), 126.91 (2C, C Ar), 136.92 (2C, C Ar), 147.93 (2C, dd, *J* = 92.3, 13.0 Hz, CF), 151.20 (2C, dd, *J* = 94.7, 12.2 Hz, CF). <sup>19</sup>F NMR (CDCl<sub>3</sub>, 282 MHz) δ -139.33 -- -139.83 (m), -141.50 -- -141.99 (m). EM (EI+), *m/z* (%): 412 (M<sup>+</sup>, 100).

HRMS (APCI (M+1)): for C<sub>26</sub>H<sub>24</sub>F<sub>2</sub> calculated 413.1887, observed 413.1882. M. P. 268.8-270.2 °C.

### Synthesis of adduct **18**

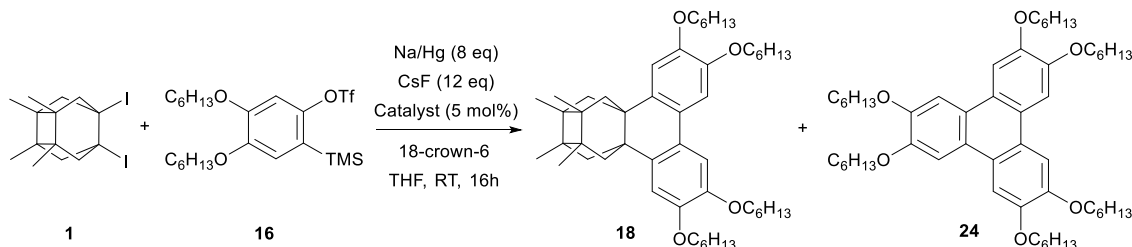

Scheme S4

Compound **1** (20 mg, 0.045 mmol), Na/Hg (5% Na, 164 mg, 0.361 mmol), CsF (84 mg, 0.552 mmol), 18-Crown-6 (73 mg, 0.276 mmol), and Pd(PPh<sub>3</sub>)<sub>4</sub> (15 mg, 0.013 mmol) were placed in an oven-dried shlenck under Ar atmosphere. Then, solution of **16** (138 mg, 0.276 mmol) in THF (4.5 mL) was added. The mixture was stirred at room temperature for 16h. After that time, the reaction mixture was filtrated through a celite plug, and purified on column chromatography (two columns were necessary, first 5:9.5 Et<sub>2</sub>O/hexane and second 1:1 CH<sub>2</sub>Cl<sub>2</sub>/hexane) to yield **18** as a white solid (14 mg, 42%). Hexyloxytriphenylene **24**<sup>5</sup> was detected as byproduct in the <sup>1</sup>H-NMR crude (3% from precursor **16**).

Data for compound **18**: <sup>1</sup>H NMR (CDCl<sub>3</sub>, 300 MHz): δ 0.98 – 0.84 (12H, m, Me), 1.04 (12H, s, Me), 1.15 (4H, d, *J* = 12.1 Hz, CH<sub>2</sub>), 1.58 – 1.23 (24H, m, CH<sub>2</sub>), 1.92 – 1.73 (8H, m, CH<sub>2</sub>), 2.18 (4H, d, *J* = 11.8 Hz, CH<sub>2</sub>), 4.13 – 3.90 (8H, m, OCH<sub>2</sub>), 6.79 (4H, s, CH Ar). <sup>13</sup>C NMR (CDCl<sub>3</sub>, 75 MHz): δ 14.21 (4C, Me), 15.81 (4C, Me), 22.81(4C, CH<sub>2</sub>), 25.94 (4C, CH<sub>2</sub>), 29.60 (4C, CH<sub>2</sub>), 31.82 (4C, CH<sub>2</sub>), 44.90 (2C, C), 45.71 (4C, C), 49.99 (4C, CH<sub>2</sub>), 69.74 (2C, OCH<sub>2</sub>), 70.19 (2C, OCH<sub>2</sub>), 109.01 (2C, CH Ar), 113.63 (2C, CH Ar), 124.68 (2C, C Ar), 132.62 (2C, C Ar), 147.73 (2C, C Ar), 148.86 (2C, C Ar). EM (MALDI-TOF), *m/z* (%); 740 (100), 741 (55), 742 (12), 743 (9), 744 (3); calculated isotopic ratio: 740 (100), 741 (57), 742 (17), 743 (3), 744 (1). HRMS (MALDI-TOF) for C<sub>50</sub>H<sub>76</sub>O<sub>4</sub>, calculated 740.574, observed 740.575. M. P. 72.5-73.8 °C.

### Synthesis of adduct **21**

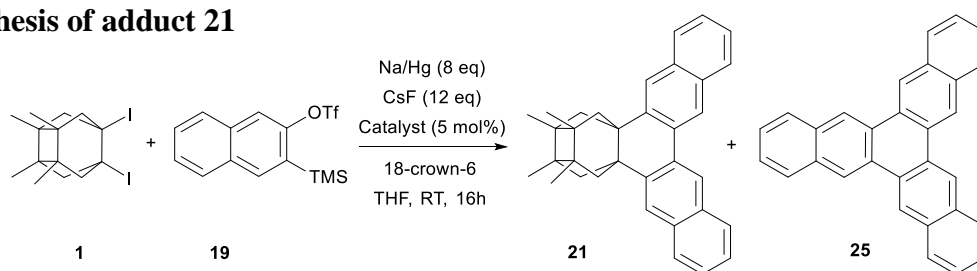

Scheme S5

Compound **1** (20 mg, 0.045 mmol), Na/Hg (5% Na, 168 mg, 0.361 mmol), CsF (84 mg, 0.552 mmol), 18-Crown-6 (73 mg, 0.276 mmol), and Pd(PPh<sub>3</sub>)<sub>4</sub> (15 mg, 0.013 mmol) were placed in an oven-dried shlenck under Ar atmosphere. Then, solution of **19** (96 mg, 0.276 mmol) in THF (4 mL) was added. The mixture was stirred at room temperature for 16h. After that time, the reaction mixture was filtrated through a celite plug, and purified on column chromatography (hexanes) to yield **21** as a white solid (11 mg, 57%). Trinaphthylene (**25**)<sup>6</sup> was isolated as byproduct (28 mg, 26% from precursor **19**). Crystallization from slow diffusion of hexane in chloroform afforded **21** as colorless crystals.

Data for compound **21**: <sup>1</sup>H NMR (CDCl<sub>3</sub>, 300 MHz): δ 1.12 (12H, s, Me), 1.48 (4H, d, *J* = 11.8 Hz, CH<sub>2</sub>), 2.34 (4H, d, *J* = 11.8 Hz, CH<sub>2</sub>), 7.39 (4H, m, CH Ar), 7.77 (2H, m, CH Ar), 7.89 (4H, m, CH Ar), 8.66 (2H, s, CH Ar). <sup>13</sup>C NMR (CDCl<sub>3</sub>, 101 MHz): δ 15.7 (4C, Me), 45.1 (2C, C), 45.8 (4C, C), 51.5 (4C, CH<sub>2</sub>), 121.5 (2C, CH Ar), 125.5 (2C, CH Ar), 125.8 (2C, CH Ar), 126.1 (2C, CH Ar), 127.1 (2C, CH Ar), 127.9 (2C, CH Ar), 129.9 (2C, C Ar), 132.2 (2C, C Ar), 133.4 (2C, C Ar), 138.9 (2C, C Ar). EM (EI+), *m/z* (%): 440 (M<sup>+</sup>, 26). HRMS: for C<sub>34</sub>H<sub>32</sub> calculated 440,2504, observed 440,2518. M. P. 276.0-277.8 °C.

### Synthesis of adduct **22**

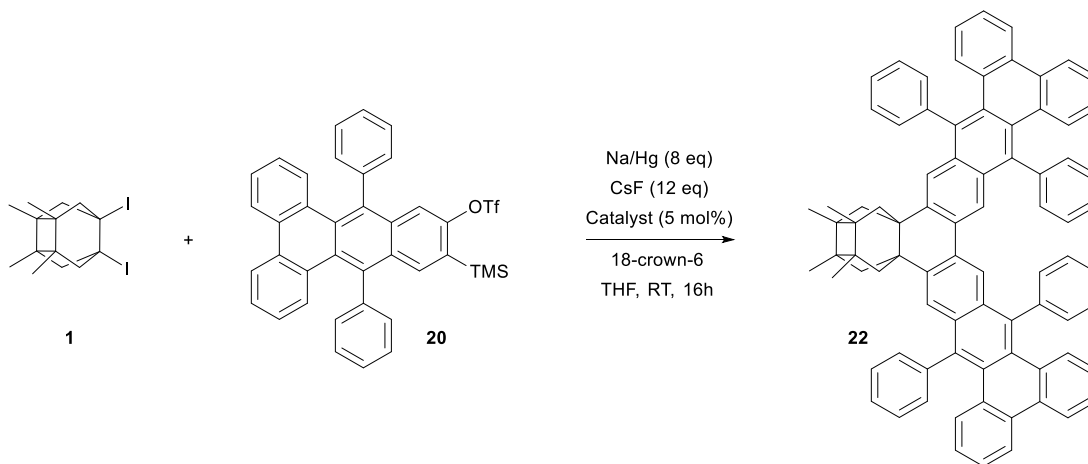

Scheme S6

Compound **1** (20 mg, 0.045 mmol), Na/Hg (5% Na, 164 mg, 0.361 mmol), CsF (84 mg, 0.552 mmol), 18-Crown-6 (73 mg, 0.276 mmol), and Pd(PPh<sub>3</sub>)<sub>4</sub> (15 mg, 0.013 mmol) were placed in an oven-dried shlenck under Ar atmosphere. Then, solution of **20** (179 mg, 0.276 mmol) in THF (4.5 mL) was added. The mixture was stirred at room temperature for 16h. After that time, the reaction mixture was filtrated through a celite plug and purified on column chromatography (2.5:7.5 CH<sub>2</sub>Cl<sub>2</sub>/hexane) followed by a precipitation in Et<sub>2</sub>O (1 mL) to yield **22** as a yellow solid (7 mg, 15%).

Data for compound **22**:  $^1\text{H}$  NMR ( $\text{C}_2\text{D}_2\text{Cl}_4$ , 400 MHz, 353 K):  $\delta$  0.93 (12H, s, 6H), 1.10 (4H, d,  $J = 12.0$  Hz,  $\text{CH}_2$ ), 2.24 (4H, d,  $J = 11.7$  Hz,  $\text{CH}_2$ ), 6.96 – 6.86 (4H, m, CH Ar), 7.53 – 7.22 (28H, m, CH Ar), 7.86 (2H, s, CH Ar), 8.18 (4H, dd,  $J = 8.1, 3.5$  Hz, CH Ar), 8.25 (2H, s, CH Ar).  $^{13}\text{C}$  NMR ( $\text{C}_2\text{D}_2\text{Cl}_4$ , 101 MHz, 353 K):  $\delta$  15.72 (4C, Me), 45.63 (2C, C), 46.10 (4C, C), 51.35 (4C,  $\text{CH}_2$ ), 121.17 (2C, CH Ar), 123.34 (4C, CH Ar), 125.41 (2C, CH Ar), 125.96 (4C, CH Ar), 126.75 (2C, CH Ar), 126.93 (2C, CH Ar), 127.80 (2C, CH Ar), 128.26 (2C, CH Ar), 128.94 (4C, CH Ar), 129.03 (4C, CH Ar), 129.24 (4C, C Ar), 130.48 (2C, C Ar), 130.76 (2C, CH Ar), 130.82 (2C, CH Ar), 131.14 (2C, C Ar), 131.84 (2C, C Ar), 131.94 (2C, C Ar), 132.16 (2C, C Ar), 132.29 (4C, C Ar), 132.56 (4C, CH Ar), 132.80 (4C, CH Ar), 134.64 (2C, C Ar), 135.69 (2C, C Ar), 139.04 (2C, C Ar), 141.15 (2C, C Ar), 141.92 (2C, C Ar). EM (MALDI-TOF),  $m/z$  (%); 1044 (100), 1045 (94), 1046 (42), 1047 (26), 1048 (13), 1049 (3); calculated isotopic ratio: 1044 (100), 1045 (92), 1046 (42), 1047 (13), 1048 (3), 1049 (3). HRMS (MALDI-TOF) for  $\text{C}_{82}\text{H}_{60}$ , calculated 1044.469, observed 1044.394.



### 3) ATTEMPTS WITH OTHER PYRAMIDALIZED ALKENES

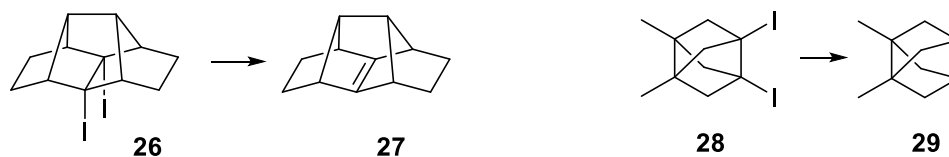

Scheme S7

The palladium-catalyzed cocyclotrimerization of arynes with alkene **2** was tested with two additional highly reactive alkenes, **27** and **29**, generated *in situ* from compounds **26** and **28**, respectively. However, preliminary attempts using optimal reaction conditions developed for alkene **2** (see Scheme S2) did not lead to the isolation of the corresponding cocyclotrimerization adducts. This finding could be explained based on the high reactivity of alkenes **27** and **29** compared to alkene **2**. In fact, the pyramidalized angle for alkenes **27** and **29** is  $62^\circ$ ,<sup>7</sup> while the corresponding pyramidalized angle for alkene **2** is  $47^\circ$ .<sup>1</sup> Therefore, it is expected that different reaction conditions would be needed depending on the reactivity of the pyramidalized alkene.

#### 4) REFERENCES

- [1] M. Rey-Carrizo, M. Barniol-Xicota, M. Font-Bardia, S. Vázquez, *Angew. Chem. Int. Ed.* 2014, **53**, 8195.
- [2] (a) Y. Himeshima, T. Sonoda, H. Kobayashi, *Chem. Lett.* 1983, 1211; (b) D. Peña, A. Cobas, D. Pérez, E. Guitián, L. Castedo, *Synthesis* 2002, 1454; (c) A. Criado, M. J. Gómez-Escalonilla, J. L. G. Fierro, A. Urbina, D. Peña, E. Guitián, F. Langa, *Chem. Commun.* 2010, **46**, 7028; (d) A. Criado, D. Peña, A. Cobas, E. Guitián, *Chem. Eur. J.* 2010, **16**, 9736; (e) J. M. Alonso, A. E. Díaz-Álvarez, A. Criado, D. Pérez, D. Peña, E. Guitián, *Angew. Chem. Int. Ed.* 2012, **51**, 173.
- [3] E. Bergmann, O. Bergmann, *J. Am. Chem. Soc.* 1937, **59**, 1441.
- [4] (a) D. Peña, S. Escudero, D. Pérez, E. Guitián, L. Castedo, *Angew. Chem. Int. Ed.* 1998, **37**, 2659; (b) J. -A. García-Lopez, M. F. Greaney, *Org. Lett.* 2014, **16**, 2338.
- [5] W.-H. Soe, C. Manzano, N. Renaud, P. de Mendoza, A. de Abir, F. Ample, M. Hilwa, A. M. Echavarren, N. Chandrasekhar, C. Joachim, *ACS Nano* 2011, **5**, 1436.
- [6] A. J. Herbaut, E. Baranoff, *RSC Adv.* 2016, **6**, 10655.
- [7] P. Camps, X. Pujol, S. Vázquez, *Org. Lett.* 2000, **2**, 4225

## 5) NMR Spectra

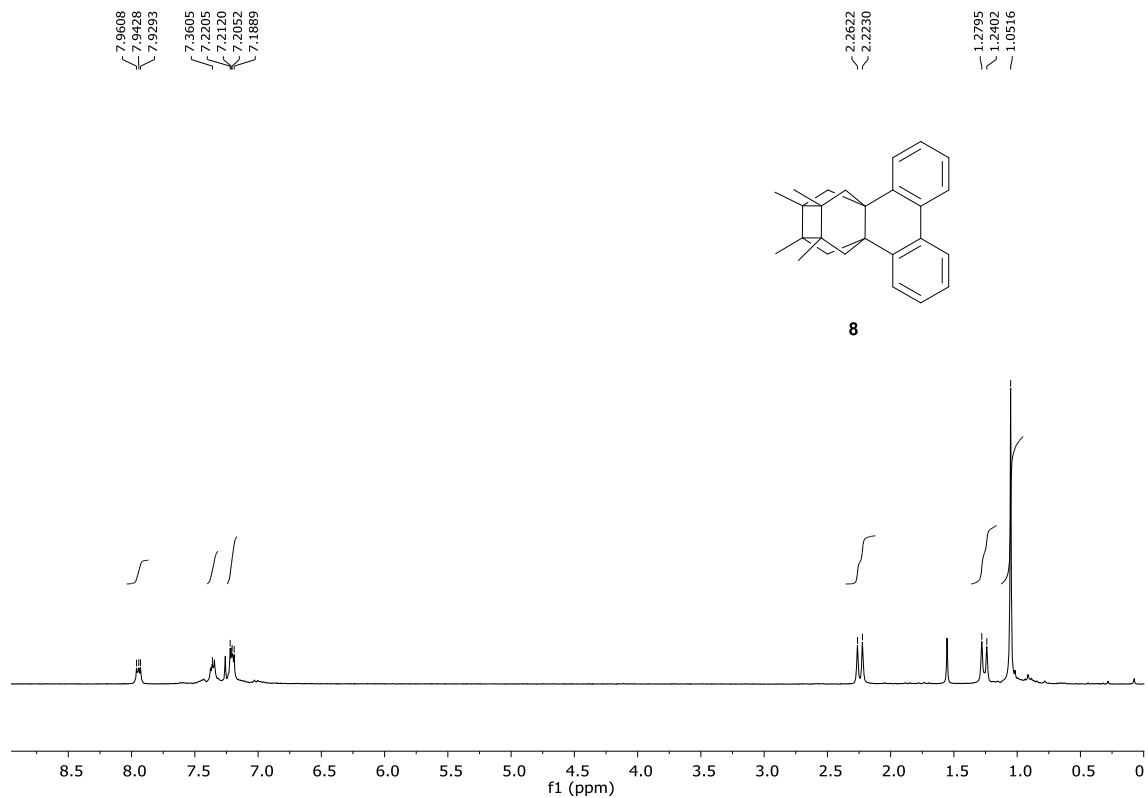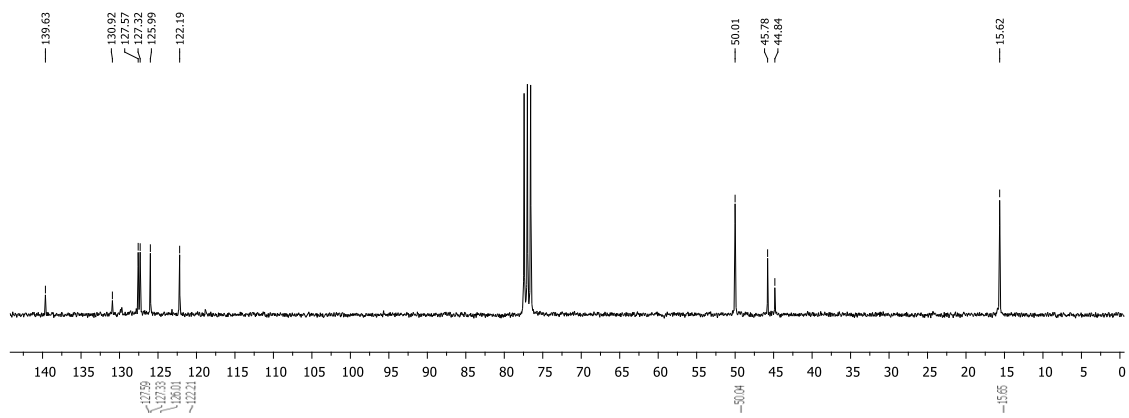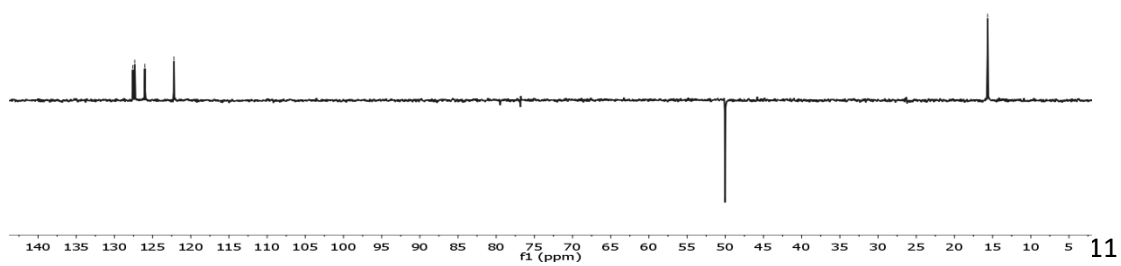

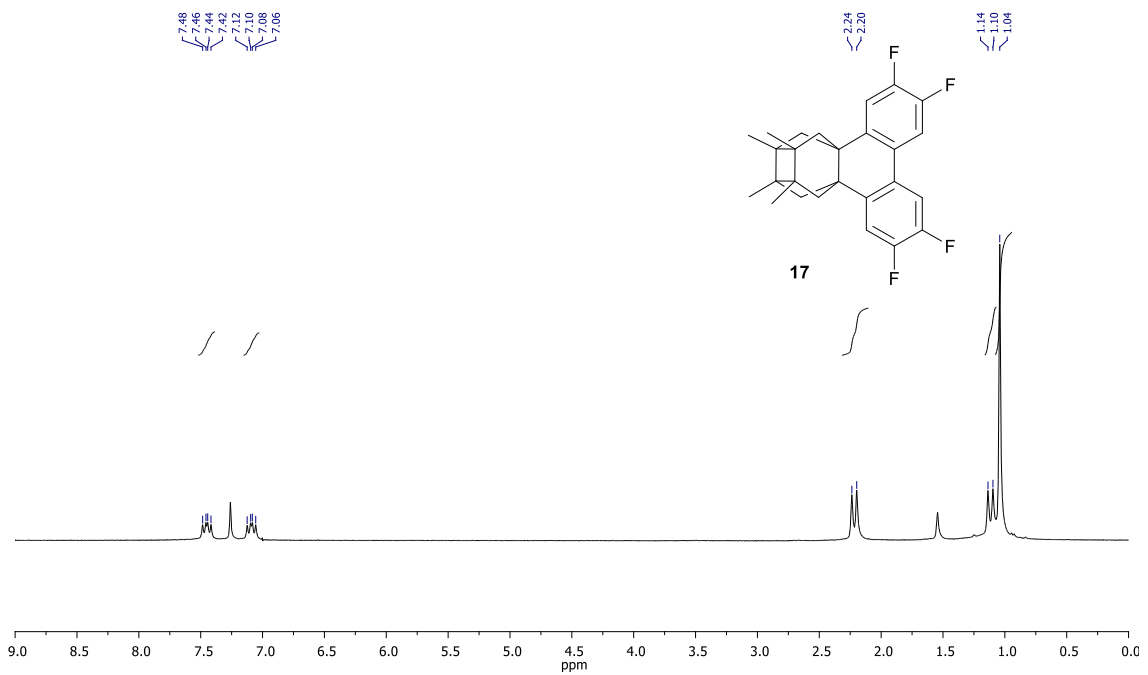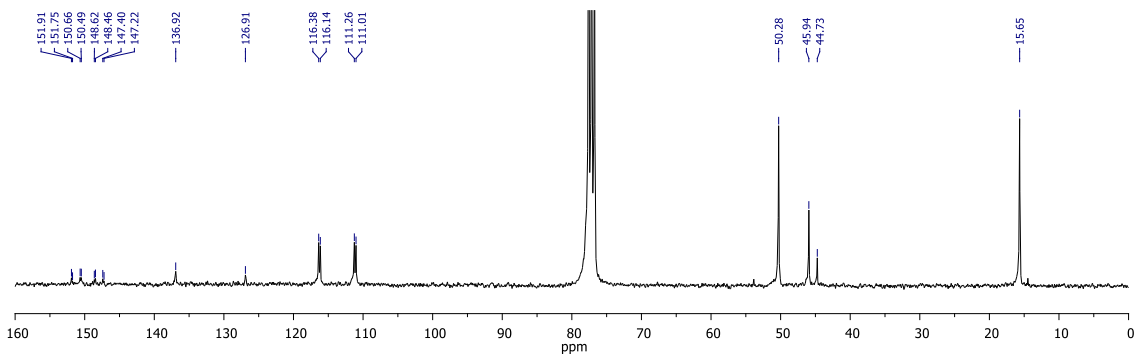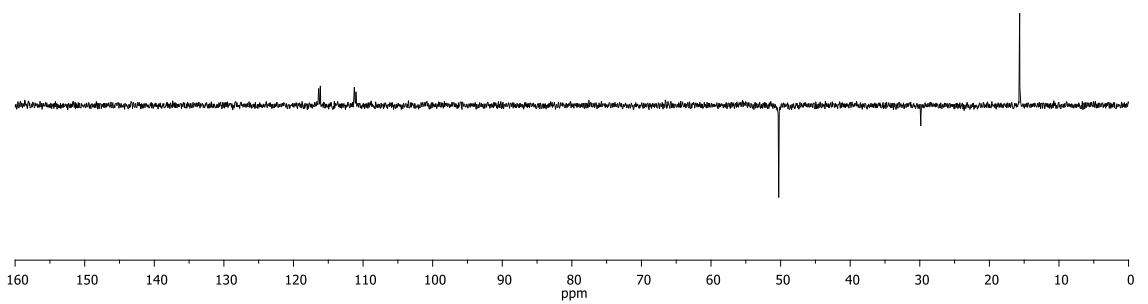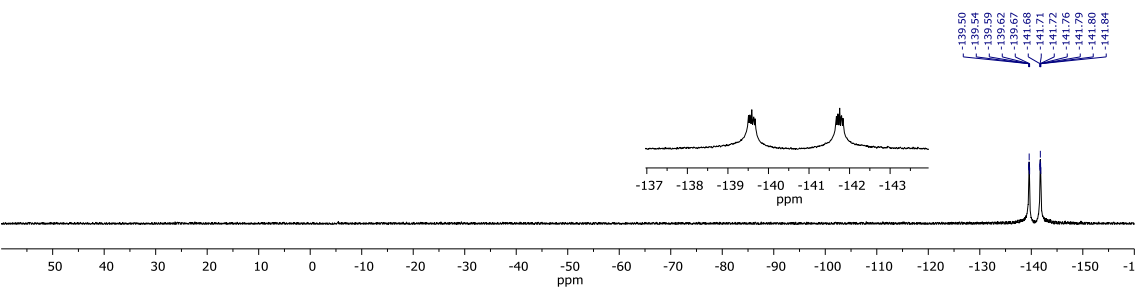

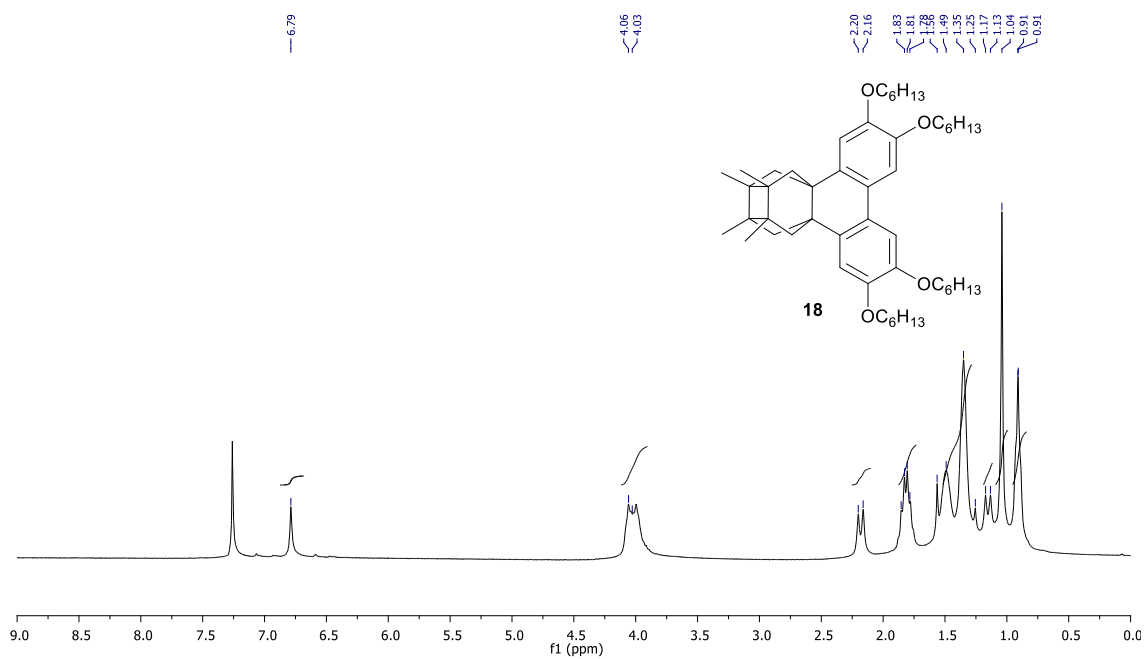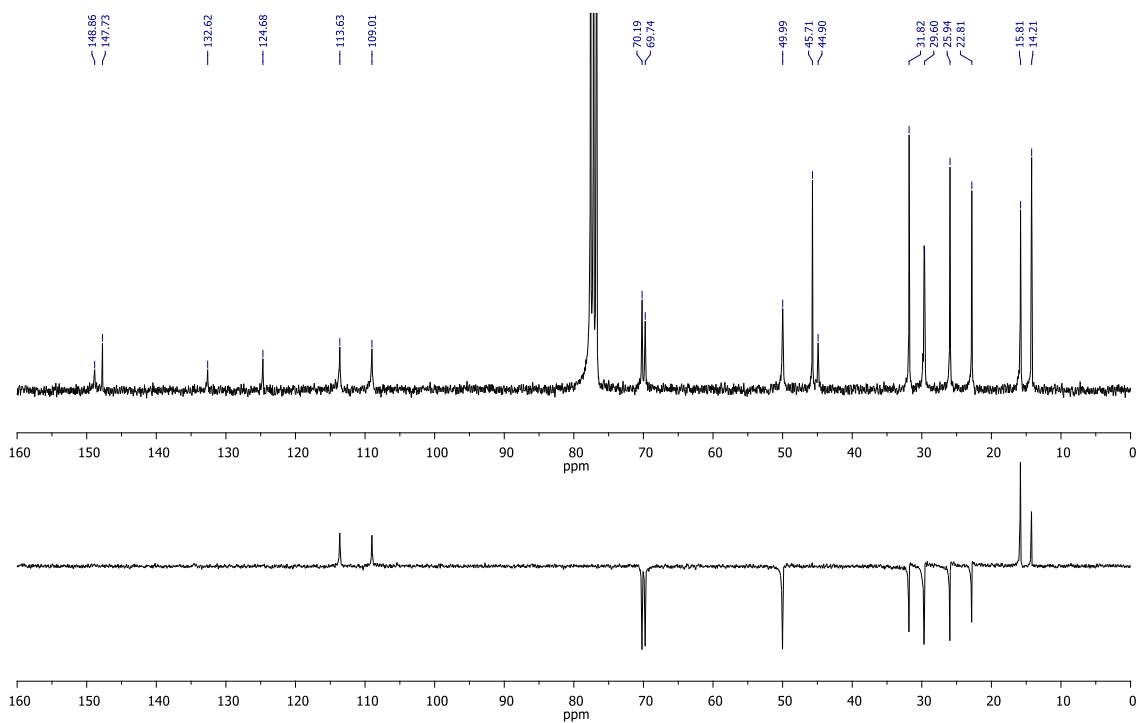

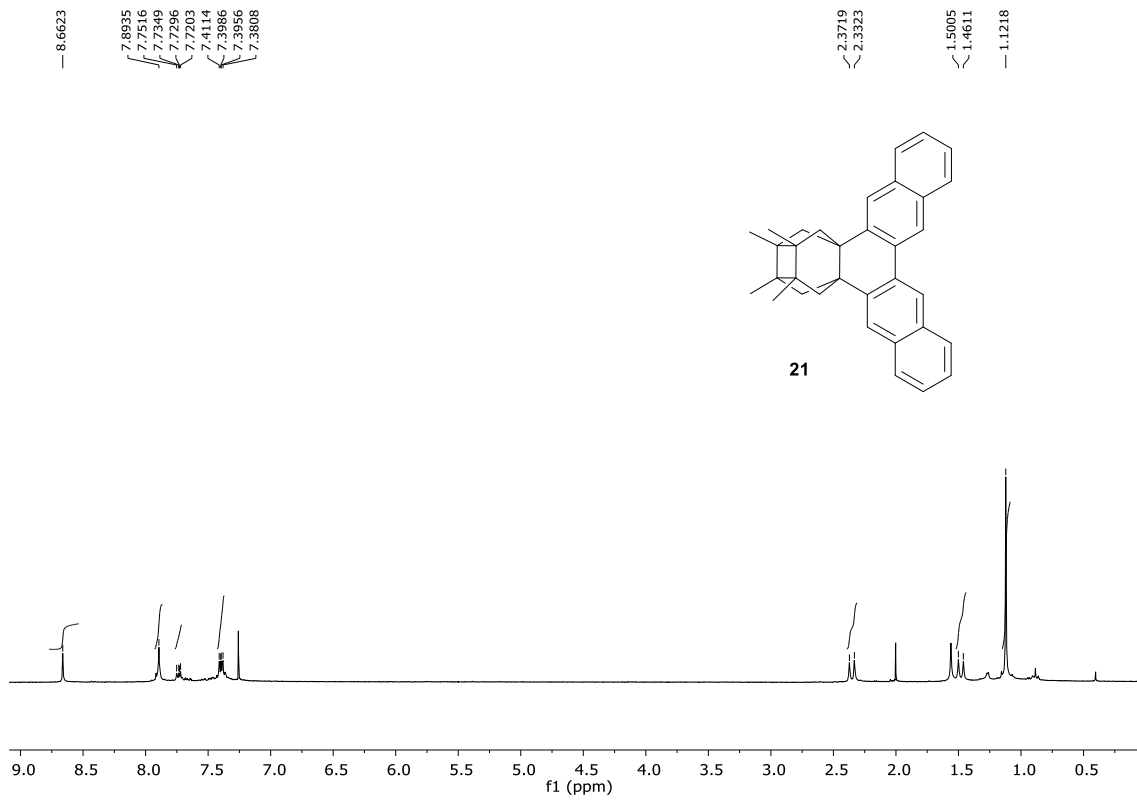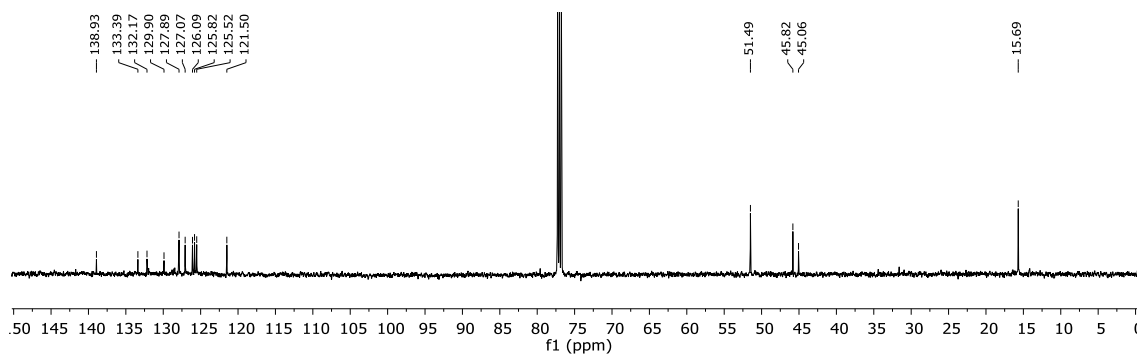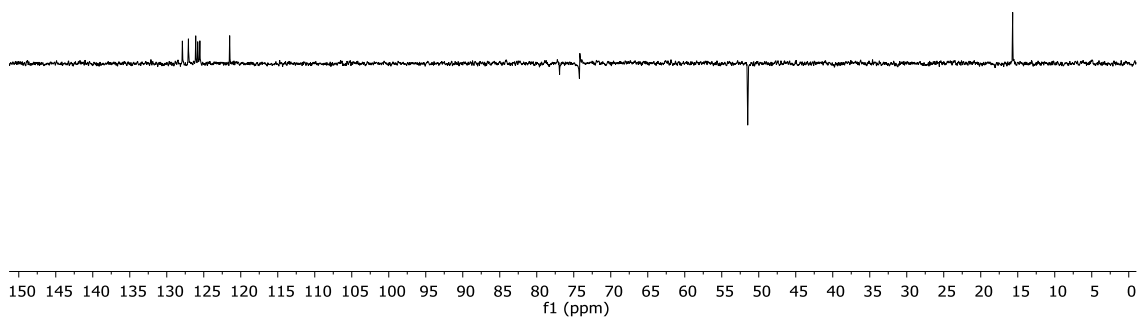

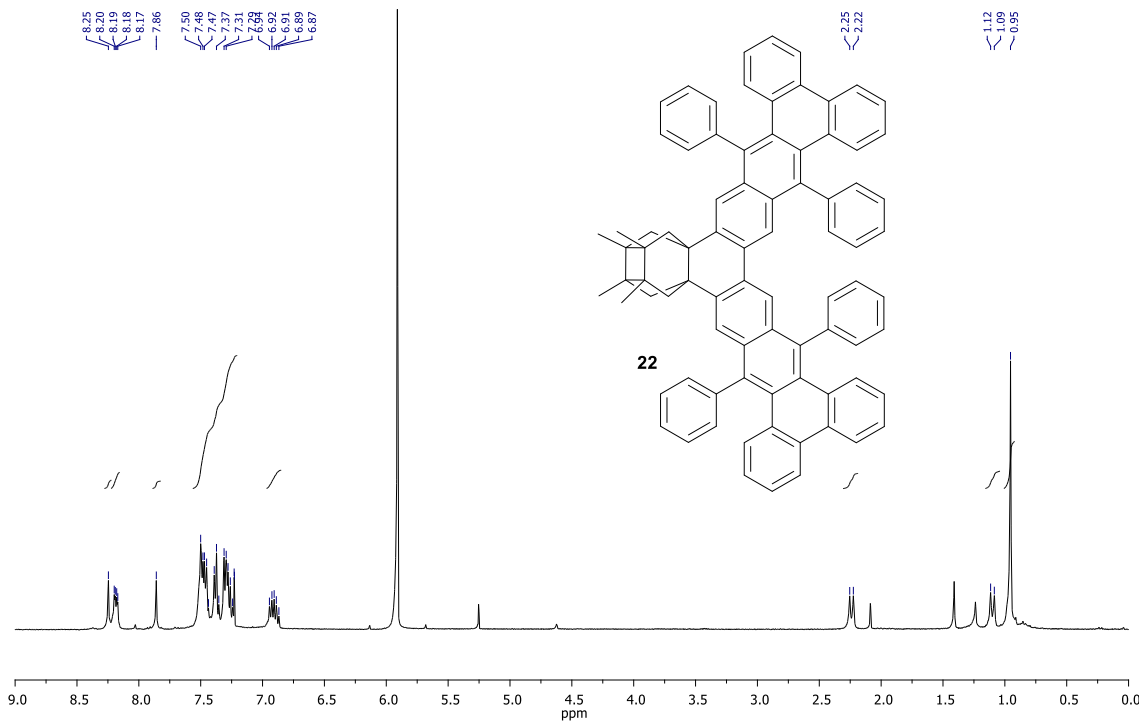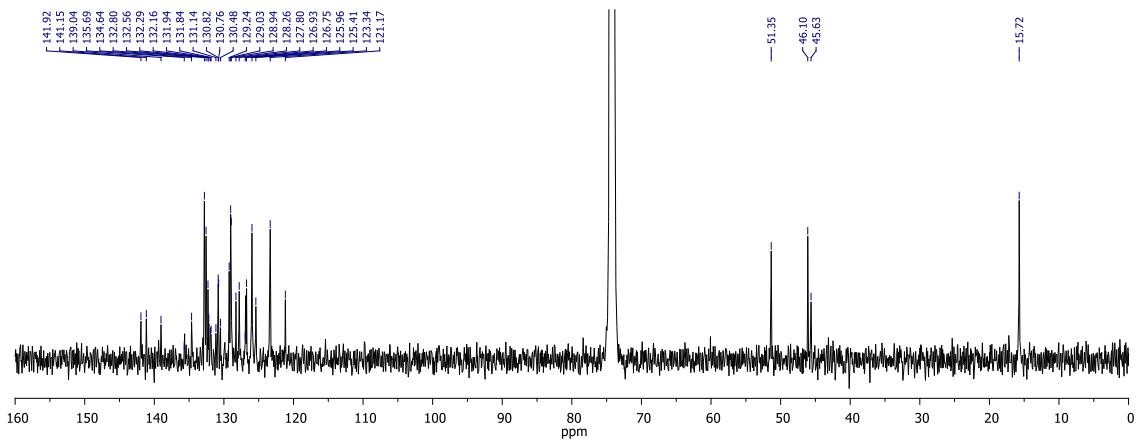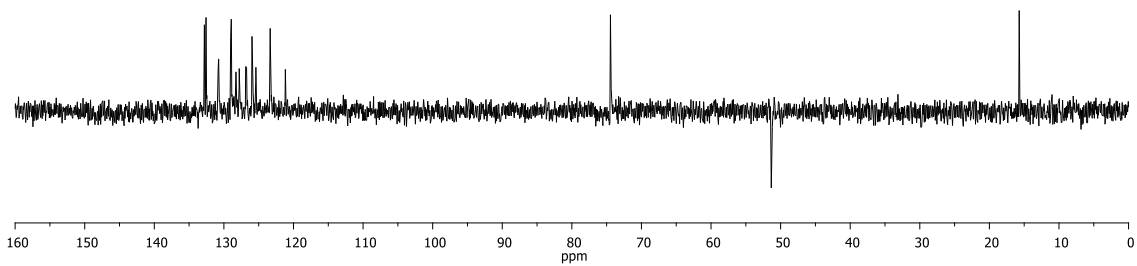

## 6) X-RAY DIFFRACTION DATA

### Analysis of compound 8 (CCDC 1554197)

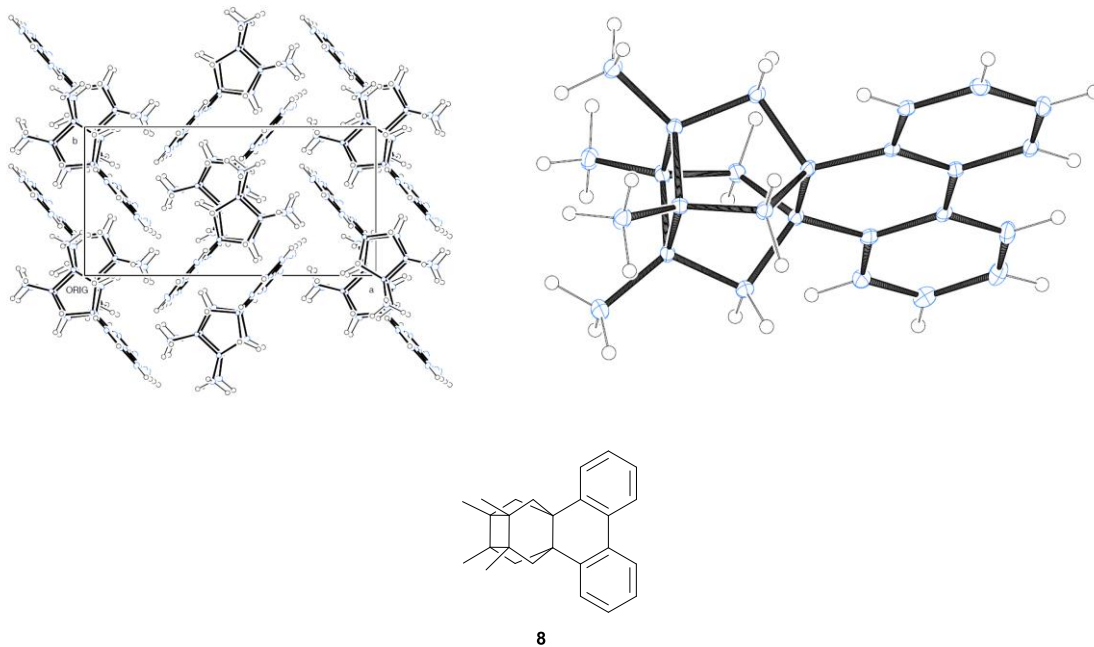

#### *Crystal data and structure refinement for compound 8.*

|                        |                                       |                |
|------------------------|---------------------------------------|----------------|
| Identification code    | shelx                                 |                |
| Empirical formula      | C <sub>26</sub> H <sub>28</sub>       |                |
| Formula weight         | 340.48                                |                |
| Temperature            | 100(2) K                              |                |
| Wavelength             | 0.71073 Å                             |                |
| Crystal system         | Monoclinic                            |                |
| Space group            | P2 <sub>1</sub> /n                    |                |
| Unit cell dimensions   | a = 15.0392(10) Å                     | α = 90°        |
|                        | b = 7.6824(6) Å                       | β = 91.082(5)° |
|                        | c = 15.9139(11) Å                     | γ = 90°        |
| Volume                 | 1838.3(2) Å <sup>3</sup>              |                |
| Z                      | 4                                     |                |
| Density (calculated)   | 1.230 Mg/m <sup>3</sup>               |                |
| Absorption coefficient | 0.069 mm <sup>-1</sup>                |                |
| F(000)                 | 736                                   |                |
| Crystal size           | 0.600 x 0.140 x 0.060 mm <sup>3</sup> |                |



|                                   |                                             |
|-----------------------------------|---------------------------------------------|
| Theta range for data collection   | 1.354 to 26.413°                            |
| Index ranges                      | -18<=h<=18, -9<=k<=9, -19<=l<=18            |
| Reflections collected             | 26454                                       |
| Independent reflections           | 3755 [R(int) = 0.0731]                      |
| Completeness to theta = 25.242°   | 100.0 %                                     |
| Refinement method                 | Full-matrix least-squares on F <sup>2</sup> |
| Data / restraints / parameters    | 3755 / 0 / 264                              |
| Goodness-of-fit on F <sup>2</sup> | 1.074                                       |
| Final R indices [I>2sigma(I)]     | R1 = 0.0684, wR2 = 0.1912                   |
| R indices (all data)              | R1 = 0.1059, wR2 = 0.2170                   |
| Largest diff. peak and hole       | 0.329 and -0.317 e.Å <sup>-3</sup>          |

Atomic coordinates ( $\times 10^4$ ) and equivalent isotropic displacement parameters ( $\text{\AA}^2 \times 10^3$ )  
 compound **8**.  $U(\text{eq})$  is defined as one third of the trace of the orthogonalized  $U^i$  tensor.

|       | x       | y        | z       | U(eq) |
|-------|---------|----------|---------|-------|
| C(1)  | 6031(2) | 8954(4)  | 1663(2) | 17(1) |
| C(2)  | 6157(2) | 9106(4)  | 798(2)  | 21(1) |
| C(3)  | 6711(2) | 10348(4) | 463(2)  | 24(1) |
| C(4)  | 7156(2) | 11489(4) | 995(2)  | 24(1) |
| C(5)  | 7054(2) | 11357(4) | 1849(2) | 22(1) |
| C(6)  | 6497(2) | 10101(4) | 2207(2) | 16(1) |
| C(7)  | 5381(2) | 7595(4)  | 1968(2) | 17(1) |
| C(8)  | 4446(2) | 7830(4)  | 1533(2) | 18(1) |
| C(9)  | 3967(2) | 6142(4)  | 1764(2) | 18(1) |
| C(10) | 4731(2) | 4735(4)  | 1821(2) | 17(1) |
| C(11) | 5581(2) | 5742(4)  | 1625(2) | 18(1) |
| C(12) | 3159(2) | 5775(4)  | 1199(2) | 23(1) |
| C(13) | 4627(2) | 3068(4)  | 1313(2) | 24(1) |
| C(21) | 5823(2) | 8758(3)  | 3485(2) | 15(1) |
| C(22) | 5758(2) | 8712(4)  | 4356(2) | 18(1) |
| C(23) | 6226(2) | 9833(4)  | 4879(2) | 21(1) |
| C(24) | 6786(2) | 11066(4) | 4526(2) | 22(1) |
| C(25) | 6866(2) | 11133(4) | 3671(2) | 20(1) |
| C(26) | 6395(2) | 9994(4)  | 3129(2) | 16(1) |
| C(27) | 5264(2) | 7487(4)  | 2962(2) | 16(1) |
| C(28) | 5384(2) | 5566(4)  | 3252(2) | 18(1) |
| C(29) | 4615(2) | 4627(4)  | 2803(2) | 18(1) |
| C(30) | 3854(2) | 6042(4)  | 2742(2) | 17(1) |
| C(31) | 4255(2) | 7651(4)  | 3166(2) | 17(1) |
| C(32) | 4397(2) | 2873(4)  | 3182(2) | 22(1) |
| C(33) | 2938(2) | 5582(4)  | 3069(2) | 22(1) |

*Bond lengths [Å] and angles [°] for compound 8.*

---

|              |          |
|--------------|----------|
| C(1)-C(2)    | 1.397(4) |
| C(1)-C(6)    | 1.412(4) |
| C(1)-C(7)    | 1.518(4) |
| C(2)-C(3)    | 1.381(4) |
| C(2)-H(2)    | 0.9500   |
| C(3)-C(4)    | 1.382(4) |
| C(3)-H(3)    | 0.9500   |
| C(4)-C(5)    | 1.375(4) |
| C(4)-H(4)    | 0.9500   |
| C(5)-C(6)    | 1.406(4) |
| C(5)-H(5)    | 0.9500   |
| C(6)-C(26)   | 1.480(4) |
| C(7)-C(11)   | 1.556(4) |
| C(7)-C(8)    | 1.565(4) |
| C(7)-C(27)   | 1.597(4) |
| C(8)-C(9)    | 1.532(4) |
| C(8)-H(8A)   | 1.04(3)  |
| C(8)-H(8B)   | 0.96(3)  |
| C(9)-C(12)   | 1.524(4) |
| C(9)-C(30)   | 1.570(4) |
| C(9)-C(10)   | 1.579(4) |
| C(10)-C(13)  | 1.521(4) |
| C(10)-C(11)  | 1.532(4) |
| C(10)-C(29)  | 1.577(4) |
| C(11)-H(11A) | 0.97(3)  |
| C(11)-H(11B) | 1.02(3)  |
| C(12)-H(12A) | 0.9800   |
| C(12)-H(12B) | 0.9800   |
| C(12)-H(12C) | 0.9800   |
| C(13)-H(13A) | 0.9800   |
| C(13)-H(13B) | 0.9800   |
| C(13)-H(13C) | 0.9800   |
| C(21)-C(22)  | 1.392(4) |
| C(21)-C(26)  | 1.408(4) |
| C(21)-C(27)  | 1.525(4) |
| C(22)-C(23)  | 1.381(4) |

|                |          |
|----------------|----------|
| C(22)-H(22)    | 0.9500   |
| C(23)-C(24)    | 1.393(4) |
| C(23)-H(23)    | 0.9500   |
| C(24)-C(25)    | 1.369(4) |
| C(24)-H(24)    | 0.9500   |
| C(25)-C(26)    | 1.411(4) |
| C(25)-H(25)    | 0.9500   |
| C(27)-C(28)    | 1.556(4) |
| C(27)-C(31)    | 1.563(4) |
| C(28)-C(29)    | 1.529(4) |
| C(28)-H(28A)   | 1.00(3)  |
| C(28)-H(28B)   | 1.02(3)  |
| C(29)-C(32)    | 1.515(4) |
| C(29)-C(30)    | 1.581(4) |
| C(30)-C(33)    | 1.524(4) |
| C(30)-C(31)    | 1.526(4) |
| C(31)-H(31A)   | 1.00(3)  |
| C(31)-H(31B)   | 1.04(3)  |
| C(32)-H(32A)   | 0.9800   |
| C(32)-H(32B)   | 0.9800   |
| C(32)-H(32C)   | 0.9800   |
| C(33)-H(33A)   | 0.9800   |
| C(33)-H(33B)   | 0.9800   |
| C(33)-H(33C)   | 0.9800   |
|                |          |
| C(2)-C(1)-C(6) | 118.5(3) |
| C(2)-C(1)-C(7) | 118.2(2) |
| C(6)-C(1)-C(7) | 123.2(3) |
| C(3)-C(2)-C(1) | 122.1(3) |
| C(3)-C(2)-H(2) | 118.9    |
| C(1)-C(2)-H(2) | 118.9    |
| C(2)-C(3)-C(4) | 119.3(3) |
| C(2)-C(3)-H(3) | 120.3    |
| C(4)-C(3)-H(3) | 120.3    |
| C(5)-C(4)-C(3) | 119.8(3) |
| C(5)-C(4)-H(4) | 120.1    |
| C(3)-C(4)-H(4) | 120.1    |
| C(4)-C(5)-C(6) | 122.1(3) |

|                     |           |
|---------------------|-----------|
| C(4)-C(5)-H(5)      | 119.0     |
| C(6)-C(5)-H(5)      | 119.0     |
| C(5)-C(6)-C(1)      | 118.1(3)  |
| C(5)-C(6)-C(26)     | 120.9(2)  |
| C(1)-C(6)-C(26)     | 120.9(3)  |
| C(1)-C(7)-C(11)     | 112.8(2)  |
| C(1)-C(7)-C(8)      | 111.0(2)  |
| C(11)-C(7)-C(8)     | 97.3(2)   |
| C(1)-C(7)-C(27)     | 115.9(2)  |
| C(11)-C(7)-C(27)    | 109.0(2)  |
| C(8)-C(7)-C(27)     | 109.3(2)  |
| C(9)-C(8)-C(7)      | 102.6(2)  |
| C(9)-C(8)-H(8A)     | 116.5(17) |
| C(7)-C(8)-H(8A)     | 113.9(17) |
| C(9)-C(8)-H(8B)     | 109.4(19) |
| C(7)-C(8)-H(8B)     | 112.3(19) |
| H(8A)-C(8)-H(8B)    | 102(2)    |
| C(12)-C(9)-C(8)     | 112.9(2)  |
| C(12)-C(9)-C(30)    | 118.4(2)  |
| C(8)-C(9)-C(30)     | 109.8(2)  |
| C(12)-C(9)-C(10)    | 118.6(2)  |
| C(8)-C(9)-C(10)     | 104.3(2)  |
| C(30)-C(9)-C(10)    | 90.1(2)   |
| C(13)-C(10)-C(11)   | 113.2(2)  |
| C(13)-C(10)-C(29)   | 118.0(2)  |
| C(11)-C(10)-C(29)   | 109.6(2)  |
| C(13)-C(10)-C(9)    | 118.6(2)  |
| C(11)-C(10)-C(9)    | 104.6(2)  |
| C(29)-C(10)-C(9)    | 90.0(2)   |
| C(10)-C(11)-C(7)    | 102.9(2)  |
| C(10)-C(11)-H(11A)  | 107.0(19) |
| C(7)-C(11)-H(11A)   | 108.6(19) |
| C(10)-C(11)-H(11B)  | 112.6(18) |
| C(7)-C(11)-H(11B)   | 115.3(18) |
| H(11A)-C(11)-H(11B) | 110(3)    |
| C(9)-C(12)-H(12A)   | 109.5     |
| C(9)-C(12)-H(12B)   | 109.5     |
| H(12A)-C(12)-H(12B) | 109.5     |

|                     |           |
|---------------------|-----------|
| C(9)-C(12)-H(12C)   | 109.5     |
| H(12A)-C(12)-H(12C) | 109.5     |
| H(12B)-C(12)-H(12C) | 109.5     |
| C(10)-C(13)-H(13A)  | 109.5     |
| C(10)-C(13)-H(13B)  | 109.5     |
| H(13A)-C(13)-H(13B) | 109.5     |
| C(10)-C(13)-H(13C)  | 109.5     |
| H(13A)-C(13)-H(13C) | 109.5     |
| H(13B)-C(13)-H(13C) | 109.5     |
| C(22)-C(21)-C(26)   | 118.2(2)  |
| C(22)-C(21)-C(27)   | 118.6(2)  |
| C(26)-C(21)-C(27)   | 123.2(2)  |
| C(23)-C(22)-C(21)   | 122.7(3)  |
| C(23)-C(22)-H(22)   | 118.7     |
| C(21)-C(22)-H(22)   | 118.7     |
| C(22)-C(23)-C(24)   | 119.1(3)  |
| C(22)-C(23)-H(23)   | 120.4     |
| C(24)-C(23)-H(23)   | 120.4     |
| C(25)-C(24)-C(23)   | 119.4(3)  |
| C(25)-C(24)-H(24)   | 120.3     |
| C(23)-C(24)-H(24)   | 120.3     |
| C(24)-C(25)-C(26)   | 122.2(3)  |
| C(24)-C(25)-H(25)   | 118.9     |
| C(26)-C(25)-H(25)   | 118.9     |
| C(21)-C(26)-C(25)   | 118.4(3)  |
| C(21)-C(26)-C(6)    | 120.8(2)  |
| C(25)-C(26)-C(6)    | 120.8(3)  |
| C(21)-C(27)-C(28)   | 112.7(2)  |
| C(21)-C(27)-C(31)   | 111.3(2)  |
| C(28)-C(27)-C(31)   | 97.1(2)   |
| C(21)-C(27)-C(7)    | 115.9(2)  |
| C(28)-C(27)-C(7)    | 109.2(2)  |
| C(31)-C(27)-C(7)    | 109.1(2)  |
| C(29)-C(28)-C(27)   | 103.0(2)  |
| C(29)-C(28)-H(28A)  | 112.3(18) |
| C(27)-C(28)-H(28A)  | 114.9(18) |
| C(29)-C(28)-H(28B)  | 112.1(18) |
| C(27)-C(28)-H(28B)  | 108.4(18) |

|                     |           |
|---------------------|-----------|
| H(28A)-C(28)-H(28B) | 106(2)    |
| C(32)-C(29)-C(28)   | 113.6(2)  |
| C(32)-C(29)-C(10)   | 118.0(2)  |
| C(28)-C(29)-C(10)   | 110.0(2)  |
| C(32)-C(29)-C(30)   | 118.3(2)  |
| C(28)-C(29)-C(30)   | 104.2(2)  |
| C(10)-C(29)-C(30)   | 89.8(2)   |
| C(33)-C(30)-C(31)   | 112.9(2)  |
| C(33)-C(30)-C(9)    | 117.7(2)  |
| C(31)-C(30)-C(9)    | 110.5(2)  |
| C(33)-C(30)-C(29)   | 118.5(2)  |
| C(31)-C(30)-C(29)   | 104.5(2)  |
| C(9)-C(30)-C(29)    | 90.1(2)   |
| C(30)-C(31)-C(27)   | 102.7(2)  |
| C(30)-C(31)-H(31A)  | 110.7(18) |
| C(27)-C(31)-H(31A)  | 107.0(17) |
| C(30)-C(31)-H(31B)  | 115.1(16) |
| C(27)-C(31)-H(31B)  | 111.5(17) |
| H(31A)-C(31)-H(31B) | 109(2)    |
| C(29)-C(32)-H(32A)  | 109.5     |
| C(29)-C(32)-H(32B)  | 109.5     |
| H(32A)-C(32)-H(32B) | 109.5     |
| C(29)-C(32)-H(32C)  | 109.5     |
| H(32A)-C(32)-H(32C) | 109.5     |
| H(32B)-C(32)-H(32C) | 109.5     |
| C(30)-C(33)-H(33A)  | 109.5     |
| C(30)-C(33)-H(33B)  | 109.5     |
| H(33A)-C(33)-H(33B) | 109.5     |
| C(30)-C(33)-H(33C)  | 109.5     |
| H(33A)-C(33)-H(33C) | 109.5     |
| H(33B)-C(33)-H(33C) | 109.5     |

---

Anisotropic displacement parameters ( $\text{\AA}^2 \times 10^3$ ) for compound **8**. The anisotropic displacement factor exponent takes the form:  $-2\pi^2 [ h^2 a^{*2} U^{11} + \dots + 2 h k a^* b^* U^{12} ]$

|       | U <sup>11</sup> | U <sup>22</sup> | U <sup>33</sup> | U <sup>23</sup> | U <sup>13</sup> | U <sup>12</sup> |
|-------|-----------------|-----------------|-----------------|-----------------|-----------------|-----------------|
| C(1)  | 12(1)           | 16(2)           | 25(2)           | 0(1)            | -1(1)           | 5(1)            |
| C(2)  | 17(2)           | 20(2)           | 26(2)           | -2(1)           | -1(1)           | 0(1)            |
| C(3)  | 19(2)           | 29(2)           | 23(2)           | 3(1)            | 2(1)            | 2(1)            |
| C(4)  | 17(2)           | 25(2)           | 30(2)           | 8(1)            | -1(1)           | -5(1)           |
| C(5)  | 17(2)           | 20(2)           | 29(2)           | 1(1)            | -6(1)           | -4(1)           |
| C(6)  | 9(1)            | 14(1)           | 27(2)           | 1(1)            | -1(1)           | 3(1)            |
| C(7)  | 12(1)           | 13(1)           | 26(2)           | -1(1)           | 0(1)            | 0(1)            |
| C(8)  | 17(2)           | 16(2)           | 20(2)           | 0(1)            | -3(1)           | 1(1)            |
| C(9)  | 17(2)           | 14(2)           | 24(2)           | -3(1)           | -3(1)           | -1(1)           |
| C(10) | 12(1)           | 13(1)           | 27(2)           | -2(1)           | -2(1)           | -1(1)           |
| C(11) | 14(2)           | 17(2)           | 23(2)           | -1(1)           | 0(1)            | 2(1)            |
| C(12) | 18(2)           | 22(2)           | 29(2)           | -2(1)           | -5(1)           | -1(1)           |
| C(13) | 21(2)           | 18(2)           | 33(2)           | -6(1)           | -1(1)           | -1(1)           |
| C(21) | 10(1)           | 12(1)           | 24(2)           | -1(1)           | -1(1)           | 4(1)            |
| C(22) | 12(1)           | 16(2)           | 26(2)           | -1(1)           | 1(1)            | 3(1)            |
| C(23) | 18(2)           | 23(2)           | 21(2)           | -5(1)           | -1(1)           | 5(1)            |
| C(24) | 15(2)           | 20(2)           | 29(2)           | -5(1)           | -5(1)           | -1(1)           |
| C(25) | 12(1)           | 16(2)           | 31(2)           | 0(1)            | -2(1)           | -1(1)           |
| C(26) | 11(1)           | 13(1)           | 25(2)           | -1(1)           | -3(1)           | 4(1)            |
| C(27) | 10(1)           | 14(1)           | 24(2)           | 0(1)            | -1(1)           | 1(1)            |
| C(28) | 14(2)           | 14(2)           | 26(2)           | 1(1)            | 0(1)            | 0(1)            |
| C(29) | 14(1)           | 14(2)           | 25(2)           | -2(1)           | -1(1)           | 3(1)            |
| C(30) | 13(1)           | 12(1)           | 26(2)           | -1(1)           | -2(1)           | 1(1)            |
| C(31) | 13(1)           | 15(2)           | 21(2)           | 1(1)            | 0(1)            | 1(1)            |
| C(32) | 16(2)           | 18(2)           | 32(2)           | 3(1)            | -2(1)           | 0(1)            |
| C(33) | 16(2)           | 18(2)           | 33(2)           | 0(1)            | 2(1)            | 0(1)            |



Hydrogen coordinates ( $\times 10^4$ ) and isotropic displacement parameters ( $\text{\AA}^2 \times 10^3$ )  
for compound **8**

|        | x        | y        | z        | U(eq) |
|--------|----------|----------|----------|-------|
| H(2)   | 5851     | 8329     | 429      | 25    |
| H(3)   | 6786     | 10417    | -128     | 29    |
| H(4)   | 7531     | 12362    | 770      | 29    |
| H(5)   | 7369     | 12139    | 2208     | 26    |
| H(8A)  | 4130(20) | 8980(40) | 1687(19) | 21    |
| H(8B)  | 4480(20) | 7910(40) | 930(20)  | 21    |
| H(11A) | 5620(20) | 5810(40) | 1020(20) | 22    |
| H(11B) | 6140(20) | 5160(40) | 1870(20) | 22    |
| H(12A) | 3342     | 5741     | 611      | 34    |
| H(12B) | 2717     | 6698     | 1270     | 34    |
| H(12C) | 2899     | 4652     | 1351     | 34    |
| H(13A) | 4639     | 3343     | 712      | 36    |
| H(13B) | 4060     | 2513     | 1444     | 36    |
| H(13C) | 5117     | 2272     | 1456     | 36    |
| H(22)  | 5377     | 7875     | 4601     | 21    |
| H(23)  | 6166     | 9764     | 5471     | 25    |
| H(24)  | 7110     | 11853    | 4876     | 26    |
| H(25)  | 7252     | 11974    | 3435     | 23    |
| H(28A) | 5980(20) | 5040(40) | 3120(20) | 21    |
| H(28B) | 5330(20) | 5520(40) | 3890(20) | 21    |
| H(31A) | 4210(20) | 7570(40) | 3793(19) | 20    |
| H(31B) | 3990(20) | 8830(40) | 2960(18) | 20    |
| H(32A) | 3888     | 2361     | 2878     | 33    |
| H(32B) | 4249     | 3024     | 3775     | 33    |
| H(32C) | 4912     | 2100     | 3139     | 33    |
| H(33A) | 2526     | 6547     | 2956     | 33    |
| H(33B) | 2979     | 5371     | 3676     | 33    |
| H(33C) | 2718     | 4530     | 2785     | 33    |

*Torsion angles [°] for compound 8*

---

|                        |           |
|------------------------|-----------|
| C(6)-C(1)-C(2)-C(3)    | -0.7(4)   |
| C(7)-C(1)-C(2)-C(3)    | 177.6(3)  |
| C(1)-C(2)-C(3)-C(4)    | -0.3(5)   |
| C(2)-C(3)-C(4)-C(5)    | 1.1(5)    |
| C(3)-C(4)-C(5)-C(6)    | -0.8(5)   |
| C(4)-C(5)-C(6)-C(1)    | -0.2(4)   |
| C(4)-C(5)-C(6)-C(26)   | -179.6(3) |
| C(2)-C(1)-C(6)-C(5)    | 1.0(4)    |
| C(7)-C(1)-C(6)-C(5)    | -177.3(3) |
| C(2)-C(1)-C(6)-C(26)   | -179.6(2) |
| C(7)-C(1)-C(6)-C(26)   | 2.1(4)    |
| C(2)-C(1)-C(7)-C(11)   | 53.5(3)   |
| C(6)-C(1)-C(7)-C(11)   | -128.2(3) |
| C(2)-C(1)-C(7)-C(8)    | -54.5(3)  |
| C(6)-C(1)-C(7)-C(8)    | 123.8(3)  |
| C(2)-C(1)-C(7)-C(27)   | -179.9(2) |
| C(6)-C(1)-C(7)-C(27)   | -1.6(4)   |
| C(1)-C(7)-C(8)-C(9)    | 167.8(2)  |
| C(11)-C(7)-C(8)-C(9)   | 50.0(3)   |
| C(27)-C(7)-C(8)-C(9)   | -63.2(3)  |
| C(7)-C(8)-C(9)-C(12)   | -161.7(2) |
| C(7)-C(8)-C(9)-C(30)   | 63.8(3)   |
| C(7)-C(8)-C(9)-C(10)   | -31.7(3)  |
| C(12)-C(9)-C(10)-C(13) | -0.3(4)   |
| C(8)-C(9)-C(10)-C(13)  | -126.9(3) |
| C(30)-C(9)-C(10)-C(13) | 122.6(3)  |
| C(12)-C(9)-C(10)-C(11) | 127.0(3)  |
| C(8)-C(9)-C(10)-C(11)  | 0.5(3)    |
| C(30)-C(9)-C(10)-C(11) | -110.1(2) |
| C(12)-C(9)-C(10)-C(29) | -122.7(3) |
| C(8)-C(9)-C(10)-C(29)  | 110.8(2)  |
| C(30)-C(9)-C(10)-C(29) | 0.2(2)    |
| C(13)-C(10)-C(11)-C(7) | 161.7(2)  |
| C(29)-C(10)-C(11)-C(7) | -64.1(3)  |
| C(9)-C(10)-C(11)-C(7)  | 31.1(3)   |
| C(1)-C(7)-C(11)-C(10)  | -166.1(2) |

|                         |           |
|-------------------------|-----------|
| C(8)-C(7)-C(11)-C(10)   | -49.7(3)  |
| C(27)-C(7)-C(11)-C(10)  | 63.7(3)   |
| C(26)-C(21)-C(22)-C(23) | 0.5(4)    |
| C(27)-C(21)-C(22)-C(23) | -178.8(3) |
| C(21)-C(22)-C(23)-C(24) | 0.0(4)    |
| C(22)-C(23)-C(24)-C(25) | -0.4(4)   |
| C(23)-C(24)-C(25)-C(26) | 0.3(4)    |
| C(22)-C(21)-C(26)-C(25) | -0.6(4)   |
| C(27)-C(21)-C(26)-C(25) | 178.6(2)  |
| C(22)-C(21)-C(26)-C(6)  | 179.6(2)  |
| C(27)-C(21)-C(26)-C(6)  | -1.2(4)   |
| C(24)-C(25)-C(26)-C(21) | 0.3(4)    |
| C(24)-C(25)-C(26)-C(6)  | -180.0(3) |
| C(5)-C(6)-C(26)-C(21)   | 178.7(3)  |
| C(1)-C(6)-C(26)-C(21)   | -0.7(4)   |
| C(5)-C(6)-C(26)-C(25)   | -1.1(4)   |
| C(1)-C(6)-C(26)-C(25)   | 179.5(3)  |
| C(22)-C(21)-C(27)-C(28) | -52.4(3)  |
| C(26)-C(21)-C(27)-C(28) | 128.4(3)  |
| C(22)-C(21)-C(27)-C(31) | 55.4(3)   |
| C(26)-C(21)-C(27)-C(31) | -123.8(3) |
| C(22)-C(21)-C(27)-C(7)  | -179.2(2) |
| C(26)-C(21)-C(27)-C(7)  | 1.6(4)    |
| C(1)-C(7)-C(27)-C(21)   | -0.2(3)   |
| C(11)-C(7)-C(27)-C(21)  | 128.3(2)  |
| C(8)-C(7)-C(27)-C(21)   | -126.4(2) |
| C(1)-C(7)-C(27)-C(28)   | -128.8(2) |
| C(11)-C(7)-C(27)-C(28)  | -0.3(3)   |
| C(8)-C(7)-C(27)-C(28)   | 105.0(2)  |
| C(1)-C(7)-C(27)-C(31)   | 126.3(2)  |
| C(11)-C(7)-C(27)-C(31)  | -105.2(3) |
| C(8)-C(7)-C(27)-C(31)   | 0.0(3)    |
| C(21)-C(27)-C(28)-C(29) | 166.6(2)  |
| C(31)-C(27)-C(28)-C(29) | 50.0(3)   |
| C(7)-C(27)-C(28)-C(29)  | -63.1(3)  |
| C(27)-C(28)-C(29)-C(32) | -161.5(2) |
| C(27)-C(28)-C(29)-C(10) | 63.6(3)   |
| C(27)-C(28)-C(29)-C(30) | -31.4(3)  |

|                         |           |
|-------------------------|-----------|
| C(13)-C(10)-C(29)-C(32) | -0.8(4)   |
| C(11)-C(10)-C(29)-C(32) | -132.4(3) |
| C(9)-C(10)-C(29)-C(32)  | 122.1(3)  |
| C(13)-C(10)-C(29)-C(28) | 131.9(3)  |
| C(11)-C(10)-C(29)-C(28) | 0.2(3)    |
| C(9)-C(10)-C(29)-C(28)  | -105.3(2) |
| C(13)-C(10)-C(29)-C(30) | -123.1(3) |
| C(11)-C(10)-C(29)-C(30) | 105.2(2)  |
| C(9)-C(10)-C(29)-C(30)  | -0.2(2)   |
| C(12)-C(9)-C(30)-C(33)  | 0.0(4)    |
| C(8)-C(9)-C(30)-C(33)   | 131.7(3)  |
| C(10)-C(9)-C(30)-C(33)  | -123.0(3) |
| C(12)-C(9)-C(30)-C(31)  | -131.7(3) |
| C(8)-C(9)-C(30)-C(31)   | 0.0(3)    |
| C(10)-C(9)-C(30)-C(31)  | 105.3(2)  |
| C(12)-C(9)-C(30)-C(29)  | 122.8(3)  |
| C(8)-C(9)-C(30)-C(29)   | -105.5(2) |
| C(10)-C(9)-C(30)-C(29)  | -0.2(2)   |
| C(32)-C(29)-C(30)-C(33) | 0.2(4)    |
| C(28)-C(29)-C(30)-C(33) | -127.1(3) |
| C(10)-C(29)-C(30)-C(33) | 122.3(3)  |
| C(32)-C(29)-C(30)-C(31) | 126.9(3)  |
| C(28)-C(29)-C(30)-C(31) | -0.4(3)   |
| C(10)-C(29)-C(30)-C(31) | -111.0(2) |
| C(32)-C(29)-C(30)-C(9)  | -121.9(3) |
| C(28)-C(29)-C(30)-C(9)  | 110.8(2)  |
| C(10)-C(29)-C(30)-C(9)  | 0.2(2)    |
| C(33)-C(30)-C(31)-C(27) | 162.0(2)  |
| C(9)-C(30)-C(31)-C(27)  | -63.9(3)  |
| C(29)-C(30)-C(31)-C(27) | 31.8(3)   |
| C(21)-C(27)-C(31)-C(30) | -167.8(2) |
| C(28)-C(27)-C(31)-C(30) | -50.1(3)  |
| C(7)-C(27)-C(31)-C(30)  | 63.0(3)   |

---

## X-Ray analysis of compound 21 (CCDC1554198):

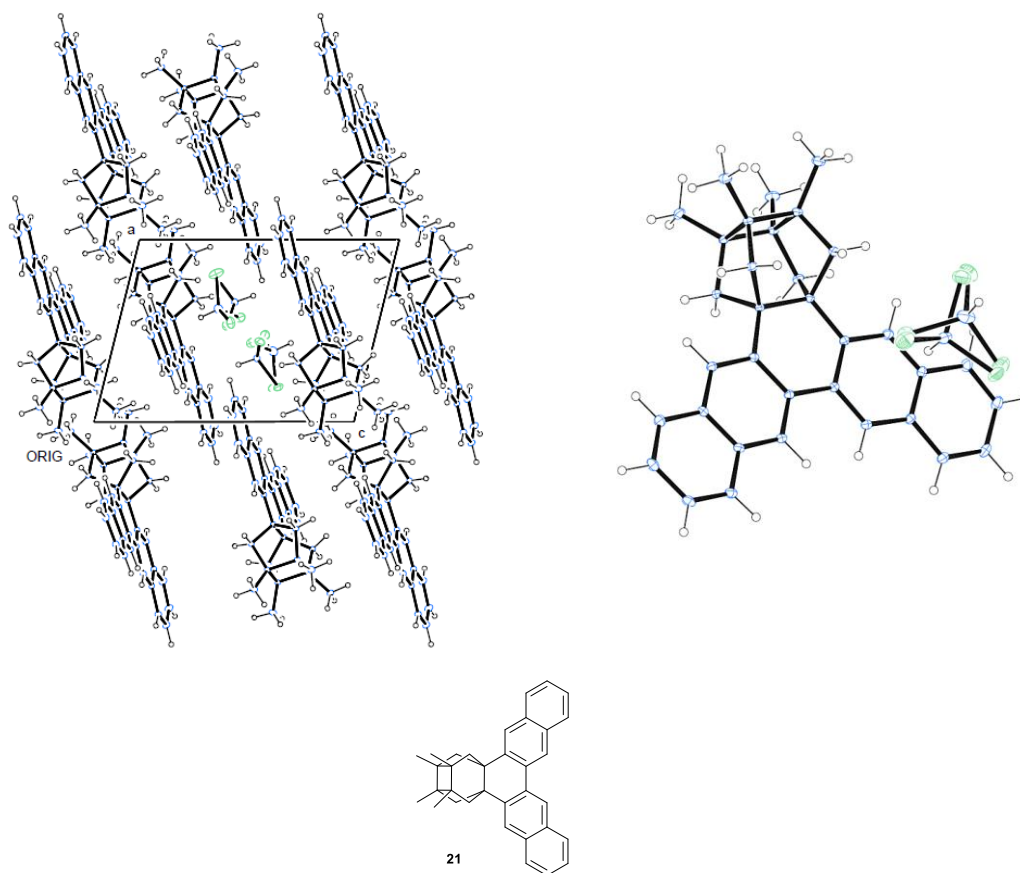

### Crystal data and structure refinement for compound 21.

|                      |                           |                              |
|----------------------|---------------------------|------------------------------|
| Identification code  | shelx                     |                              |
| Empirical formula    | $C_{34}H_{32}$ , $CHCl_3$ |                              |
| Formula weight       | 559.96                    |                              |
| Temperature          | 100(2) K                  |                              |
| Wavelength           | 0.71073 Å                 |                              |
| Crystal system       | Triclinic                 |                              |
| Space group          | <i>P</i> -1               |                              |
| Unit cell dimensions | $a = 9.5957(2)$ Å         | $\alpha = 73.4440(10)^\circ$ |
|                      | $b = 12.2865(3)$ Å        | $\beta = 72.2900(10)^\circ$  |
|                      | $c = 13.2430(3)$ Å        | $\gamma = 73.1600(10)^\circ$ |
| Volume               | 1389.98(6) Å <sup>3</sup> |                              |
| Z                    | 2                         |                              |
| Density (calculated) | 1.338 Mg/m <sup>3</sup>   |                              |

|                                   |                                             |
|-----------------------------------|---------------------------------------------|
| Absorption coefficient            | 0.354 mm <sup>-1</sup>                      |
| F(000)                            | 588                                         |
| Crystal size                      | 0.420 x 0.400 x 0.200 mm <sup>3</sup>       |
| Theta range for data collection   | 1.653 to 30.546°                            |
| Index ranges                      | -13<=h<=13, -17<=k<=17, -18<=l<=18          |
| Reflections collected             | 63677                                       |
| Independent reflections           | 8507 [R(int) = 0.0514]                      |
| Completeness to theta = 25.242°   | 100.0 %                                     |
| Refinement method                 | Full-matrix least-squares on F <sup>2</sup> |
| Data / restraints / parameters    | 8507 / 0 / 482                              |
| Goodness-of-fit on F <sup>2</sup> | 1.049                                       |
| Final R indices [I>2sigma(I)]     | R1 = 0.0472, wR2 = 0.1146                   |
| R indices (all data)              | R1 = 0.0743, wR2 = 0.1279                   |
| Largest diff. peak and hole       | 0.443 and -0.384 e.Å <sup>-3</sup>          |

*Fractional atomic coordinates and isotropic or equivalent isotropic displacement parameters (Å<sup>2</sup>) for compound 21*

|      | <i>x</i>      | <i>y</i>     | <i>z</i>     | <i>U</i> <sub>iso</sub> */ <i>U</i> <sub>eq</sub> | Occ. (<1) |
|------|---------------|--------------|--------------|---------------------------------------------------|-----------|
| C1   | 0.40274 (13)  | 0.33423 (11) | 0.27405 (10) | 0.0124 (2)                                        |           |
| C2   | 0.31290 (13)  | 0.44681 (11) | 0.28672 (10) | 0.0127 (2)                                        |           |
| C3   | 0.16243 (13)  | 0.45746 (12) | 0.33915 (11) | 0.0149 (3)                                        |           |
| H3   | 0.1023 (16)   | 0.5330 (13)  | 0.3433 (12)  | 0.018*                                            |           |
| C4   | 0.09465 (13)  | 0.36117 (11) | 0.38401 (10) | 0.0140 (2)                                        |           |
| C5   | -0.06095 (14) | 0.37329 (13) | 0.43617 (11) | 0.0180 (3)                                        |           |
| H5   | -0.1229 (17)  | 0.4524 (14)  | 0.4373 (13)  | 0.022*                                            |           |
| C6   | -0.12152 (15) | 0.27737 (13) | 0.47864 (12) | 0.0207 (3)                                        |           |
| H6   | -0.2269 (18)  | 0.2846 (14)  | 0.5156 (13)  | 0.025*                                            |           |
| C7   | -0.03025 (15) | 0.16505 (13) | 0.47316 (12) | 0.0228 (3)                                        |           |
| H7   | -0.0725 (18)  | 0.0961 (15)  | 0.5035 (14)  | 0.027*                                            |           |
| C8   | 0.11949 (15)  | 0.15029 (13) | 0.42426 (12) | 0.0203 (3)                                        |           |
| H8   | 0.1875 (18)   | 0.0726 (14)  | 0.4195 (13)  | 0.024*                                            |           |
| C9   | 0.18544 (14)  | 0.24864 (11) | 0.37663 (10) | 0.0147 (3)                                        |           |
| C10  | 0.33756 (14)  | 0.23933 (12) | 0.32014 (11) | 0.0156 (3)                                        |           |
| H10  | 0.3964 (16)   | 0.1600 (14)  | 0.3136 (12)  | 0.019*                                            |           |
| C11  | 0.56535 (13)  | 0.31389 (10) | 0.21008 (10) | 0.0120 (2)                                        |           |
| C12  | 0.67071 (13)  | 0.21984 (11) | 0.27667 (11) | 0.0139 (2)                                        |           |
| H12A | 0.6837 (15)   | 0.2446 (13)  | 0.3378 (13)  | 0.017*                                            |           |
| H12B | 0.6266 (16)   | 0.1504 (13)  | 0.3112 (12)  | 0.017*                                            |           |
| C13  | 0.81461 (13)  | 0.19249 (11) | 0.18949 (10) | 0.0139 (2)                                        |           |
| C14  | 0.91893 (15)  | 0.07755 (12) | 0.22462 (13) | 0.0199 (3)                                        |           |
| H14A | 1.0042 (19)   | 0.0544 (15)  | 0.1697 (14)  | 0.03*                                             |           |
| H14B | 0.8679 (19)   | 0.0106 (15)  | 0.2498 (14)  | 0.03*                                             |           |

|      | <i>x</i>     | <i>y</i>     | <i>z</i>     | <i>U</i> <sub>iso</sub> */ <i>U</i> <sub>eq</sub> | Occ. (<1) |
|------|--------------|--------------|--------------|---------------------------------------------------|-----------|
| H14C | 0.9551 (18)  | 0.0803 (14)  | 0.2861 (14)  | 0.03*                                             |           |
| C15  | 0.58841 (13) | 0.24829 (11) | 0.12016 (11) | 0.0135 (2)                                        |           |
| H15A | 0.5431 (16)  | 0.1787 (13)  | 0.1531 (12)  | 0.016*                                            |           |
| H15B | 0.5375 (16)  | 0.2915 (13)  | 0.0625 (12)  | 0.016*                                            |           |
| C16  | 0.75934 (13) | 0.21178 (11) | 0.08364 (11) | 0.0142 (2)                                        |           |
| C17  | 0.81243 (15) | 0.11437 (13) | 0.02211 (13) | 0.0202 (3)                                        |           |
| H17A | 0.7691 (18)  | 0.1357 (14)  | -0.0407 (14) | 0.03*                                             |           |
| H17B | 0.7832 (18)  | 0.0439 (16)  | 0.0662 (14)  | 0.03*                                             |           |
| H17C | 0.9169 (19)  | 0.0958 (15)  | -0.0026 (14) | 0.03*                                             |           |
| C21  | 0.53137 (13) | 0.54121 (11) | 0.18107 (10) | 0.0126 (2)                                        |           |
| C22  | 0.38029 (13) | 0.55049 (11) | 0.24398 (10) | 0.0123 (2)                                        |           |
| C23  | 0.29694 (13) | 0.65784 (11) | 0.26493 (11) | 0.0144 (3)                                        |           |
| H23  | 0.1947 (17)  | 0.6648 (13)  | 0.3105 (12)  | 0.017*                                            |           |
| C24  | 0.35420 (13) | 0.75942 (11) | 0.22431 (10) | 0.0141 (3)                                        |           |
| C25  | 0.26714 (15) | 0.86982 (11) | 0.24489 (11) | 0.0171 (3)                                        |           |
| H25  | 0.1664 (17)  | 0.8724 (13)  | 0.2888 (13)  | 0.02*                                             |           |
| C26  | 0.32594 (15) | 0.96654 (12) | 0.20174 (11) | 0.0184 (3)                                        |           |
| H26  | 0.2651 (17)  | 1.0407 (14)  | 0.2157 (13)  | 0.022*                                            |           |
| C27  | 0.47428 (15) | 0.95818 (12) | 0.13660 (12) | 0.0192 (3)                                        |           |
| H27  | 0.5170 (17)  | 1.0274 (14)  | 0.1036 (13)  | 0.023*                                            |           |
| C28  | 0.56050 (15) | 0.85325 (12) | 0.11619 (12) | 0.0185 (3)                                        |           |
| H28  | 0.6596 (18)  | 0.8457 (13)  | 0.0706 (13)  | 0.022*                                            |           |
| C29  | 0.50296 (14) | 0.75102 (11) | 0.15923 (11) | 0.0142 (2)                                        |           |
| C30  | 0.58719 (14) | 0.64085 (11) | 0.14029 (11) | 0.0150 (3)                                        |           |
| H30  | 0.6902 (17)  | 0.6382 (13)  | 0.0983 (12)  | 0.018*                                            |           |



|      | <i>x</i>     | <i>y</i>     | <i>z</i>      | <i>U</i> <sub>iso</sub> */ <i>U</i> <sub>eq</sub> | Occ. (<1) |
|------|--------------|--------------|---------------|---------------------------------------------------|-----------|
| C31  | 0.63492 (13) | 0.42672 (10) | 0.15748 (10)  | 0.0120 (2)                                        |           |
| C32  | 0.70195 (13) | 0.43296 (11) | 0.03392 (10)  | 0.0136 (2)                                        |           |
| H32A | 0.6301 (16)  | 0.4380 (12)  | -0.0062 (12)  | 0.016*                                            |           |
| H32B | 0.7453 (16)  | 0.5032 (13)  | -0.0016 (12)  | 0.016*                                            |           |
| C33  | 0.82798 (13) | 0.32241 (11) | 0.03197 (10)  | 0.0136 (2)                                        |           |
| C34  | 0.94274 (15) | 0.32537 (13) | -0.07616 (11) | 0.0192 (3)                                        |           |
| H34A | 0.9001 (18)  | 0.3266 (14)  | -0.1357 (14)  | 0.029*                                            |           |
| H34B | 1.0270 (18)  | 0.2570 (15)  | -0.0788 (13)  | 0.029*                                            |           |
| H34C | 0.9843 (18)  | 0.3939 (15)  | -0.0985 (14)  | 0.029*                                            |           |
| C35  | 0.78461 (13) | 0.40429 (11) | 0.19039 (11)  | 0.0137 (2)                                        |           |
| H35A | 0.8275 (16)  | 0.4744 (13)  | 0.1577 (12)   | 0.016*                                            |           |
| H35B | 0.7742 (16)  | 0.3900 (13)  | 0.2682 (13)   | 0.016*                                            |           |
| C36  | 0.88330 (13) | 0.30325 (11) | 0.13779 (11)  | 0.0139 (2)                                        |           |
| C37  | 1.04975 (14) | 0.28896 (13) | 0.12704 (13)  | 0.0200 (3)                                        |           |
| H37A | 1.1136 (18)  | 0.2254 (15)  | 0.0878 (14)   | 0.03*                                             |           |
| H37B | 1.0762 (18)  | 0.2703 (14)  | 0.1943 (14)   | 0.03*                                             |           |
| H37C | 1.0831 (18)  | 0.3645 (15)  | 0.0862 (14)   | 0.03*                                             |           |
| C40  | 0.3441 (2)   | 0.27165 (19) | 0.57125 (18)  | 0.0248 (6)                                        | 0.758 (5) |
| H40  | 0.309 (2)    | 0.2901 (19)  | 0.5062 (19)   | 0.03*                                             | 0.758 (5) |
| Cl41 | 0.46921 (15) | 0.13392 (15) | 0.58104 (11)  | 0.0452 (3)                                        | 0.758 (5) |
| Cl42 | 0.18552 (19) | 0.27006 (17) | 0.68161 (14)  | 0.0411 (4)                                        | 0.758 (5) |
| Cl43 | 0.43489 (9)  | 0.37886 (13) | 0.56581 (10)  | 0.0400 (3)                                        | 0.758 (5) |
| C50  | 0.3820 (8)   | 0.2198 (6)   | 0.6275 (7)    | 0.034 (2)                                         | 0.242 (5) |
| H50  | 0.427 (8)    | 0.205 (6)    | 0.688 (6)     | 0.041*                                            | 0.242 (5) |
| Cl51 | 0.4555 (5)   | 0.0991 (4)   | 0.5688 (3)    | 0.0396 (7)                                        | 0.242 (5) |

|      |            |            |            |             |           |
|------|------------|------------|------------|-------------|-----------|
| Cl52 | 0.1873 (8) | 0.2395 (6) | 0.6702 (6) | 0.0596 (16) | 0.242 (5) |
| Cl53 | 0.4299 (3) | 0.3473 (3) | 0.5356 (4) | 0.0395 (9)  | 0.242 (5) |

*Atomic displacement parameters (Å<sup>2</sup>)*

|     | <i>U</i> 11 | <i>U</i> 22 | <i>U</i> 33 | <i>U</i> 12 | <i>U</i> 13 | <i>U</i> 23 |
|-----|-------------|-------------|-------------|-------------|-------------|-------------|
| C1  | 0.0118 (5)  | 0.0140 (6)  | 0.0117 (6)  | -0.0023 (4) | -0.0029 (4) | -0.0038 (5) |
| C2  | 0.0123 (5)  | 0.0138 (6)  | 0.0126 (6)  | -0.0030 (4) | -0.0030 (5) | -0.0036 (5) |
| C3  | 0.0127 (5)  | 0.0147 (6)  | 0.0163 (7)  | -0.0002 (5) | -0.0034 (5) | -0.0049 (5) |
| C4  | 0.0130 (5)  | 0.0177 (6)  | 0.0119 (6)  | -0.0037 (5) | -0.0025 (5) | -0.0043 (5) |
| C5  | 0.0134 (6)  | 0.0222 (7)  | 0.0178 (7)  | -0.0031 (5) | -0.0028 (5) | -0.0055 (6) |
| C6  | 0.0149 (6)  | 0.0294 (8)  | 0.0177 (7)  | -0.0085 (5) | 0.0011 (5)  | -0.0067 (6) |
| C7  | 0.0223 (7)  | 0.0236 (8)  | 0.0231 (8)  | -0.0118 (6) | 0.0023 (6)  | -0.0073 (6) |
| C8  | 0.0207 (6)  | 0.0179 (7)  | 0.0216 (7)  | -0.0070 (5) | 0.0003 (5)  | -0.0062 (6) |
| C9  | 0.0157 (6)  | 0.0161 (6)  | 0.0132 (6)  | -0.0051 (5) | -0.0025 (5) | -0.0039 (5) |
| C10 | 0.0156 (6)  | 0.0142 (6)  | 0.0165 (7)  | -0.0023 (5) | -0.0023 (5) | -0.0055 (5) |
| C11 | 0.0112 (5)  | 0.0109 (6)  | 0.0133 (6)  | -0.0017 (4) | -0.0024 (4) | -0.0032 (5) |
| C12 | 0.0136 (5)  | 0.0127 (6)  | 0.0136 (6)  | -0.0011 (5) | -0.0036 (5) | -0.0017 (5) |
| C13 | 0.0127 (5)  | 0.0126 (6)  | 0.0155 (6)  | 0.0007 (4)  | -0.0047 (5) | -0.0035 (5) |
| C14 | 0.0169 (6)  | 0.0150 (7)  | 0.0250 (8)  | 0.0015 (5)  | -0.0072 (6) | -0.0033 (6) |
| C15 | 0.0112 (5)  | 0.0147 (6)  | 0.0156 (6)  | -0.0021 (5) | -0.0023 (5) | -0.0066 (5) |
| C16 | 0.0123 (5)  | 0.0138 (6)  | 0.0161 (6)  | 0.0009 (4)  | -0.0033 (5) | -0.0064 (5) |
| C17 | 0.0178 (6)  | 0.0192 (7)  | 0.0243 (8)  | 0.0013 (5)  | -0.0047 (6) | -0.0117 (6) |
| C21 | 0.0121 (5)  | 0.0129 (6)  | 0.0127 (6)  | -0.0008 (4) | -0.0041 (5) | -0.0036 (5) |
| C22 | 0.0118 (5)  | 0.0131 (6)  | 0.0125 (6)  | -0.0020 (4) | -0.0036 (4) | -0.0035 (5) |
| C23 | 0.0118 (5)  | 0.0150 (6)  | 0.0156 (6)  | -0.0006 (5) | -0.0025 (5) | -0.0050 (5) |
| C24 | 0.0148 (6)  | 0.0129 (6)  | 0.0143 (6)  | 0.0003 (5)  | -0.0052 (5) | -0.0043 (5) |
| C25 | 0.0174 (6)  | 0.0156 (6)  | 0.0173 (7)  | 0.0008 (5)  | -0.0048 (5) | -0.0061 (5) |

|                                    | <i>U</i> 11 | <i>U</i> 22 | <i>U</i> 33 | <i>U</i> 12  | <i>U</i> 13  | <i>U</i> 23  |
|------------------------------------|-------------|-------------|-------------|--------------|--------------|--------------|
| C26                                | 0.0235 (6)  | 0.0126 (6)  | 0.0196 (7)  | 0.0004 (5)   | -0.0081 (5)  | -0.0057 (5)  |
| C27                                | 0.0258 (7)  | 0.0126 (6)  | 0.0212 (7)  | -0.0050 (5)  | -0.0083 (6)  | -0.0031 (5)  |
| C28                                | 0.0186 (6)  | 0.0155 (7)  | 0.0207 (7)  | -0.0044 (5)  | -0.0034 (5)  | -0.0037 (5)  |
| C29                                | 0.0159 (6)  | 0.0119 (6)  | 0.0150 (6)  | -0.0024 (5)  | -0.0054 (5)  | -0.0021 (5)  |
| C30                                | 0.0128 (5)  | 0.0139 (6)  | 0.0170 (6)  | -0.0021 (5)  | -0.0012 (5)  | -0.0046 (5)  |
| C31                                | 0.0103 (5)  | 0.0116 (6)  | 0.0132 (6)  | -0.0013 (4)  | -0.0023 (4)  | -0.0030 (5)  |
| C32                                | 0.0111 (5)  | 0.0135 (6)  | 0.0133 (6)  | -0.0005 (4)  | -0.0017 (5)  | -0.0023 (5)  |
| C33                                | 0.0102 (5)  | 0.0160 (6)  | 0.0131 (6)  | -0.0008 (4)  | -0.0010 (4)  | -0.0048 (5)  |
| C34                                | 0.0146 (6)  | 0.0229 (7)  | 0.0161 (7)  | -0.0013 (5)  | 0.0000 (5)   | -0.0054 (6)  |
| C35                                | 0.0122 (5)  | 0.0135 (6)  | 0.0160 (6)  | -0.0025 (4)  | -0.0035 (5)  | -0.0043 (5)  |
| C36                                | 0.0101 (5)  | 0.0144 (6)  | 0.0162 (6)  | -0.0003 (4)  | -0.0033 (5)  | -0.0039 (5)  |
| C37                                | 0.0126 (6)  | 0.0219 (7)  | 0.0254 (8)  | -0.0013 (5)  | -0.0062 (5)  | -0.0060 (6)  |
| C40                                | 0.0194 (9)  | 0.0339 (13) | 0.0175 (11) | 0.0027 (8)   | -0.0056 (8)  | -0.0074 (9)  |
| Cl41                               | 0.0427 (5)  | 0.0413 (7)  | 0.0326 (5)  | 0.0137 (4)   | -0.0067 (3)  | -0.0049 (4)  |
| Cl42                               | 0.0221 (3)  | 0.0531 (9)  | 0.0315 (4)  | 0.0013 (5)   | 0.0032 (3)   | -0.0041 (5)  |
| Cl43                               | 0.0283 (3)  | 0.0533 (6)  | 0.0443 (5)  | -0.0096 (3)  | -0.0133 (3)  | -0.0142 (4)  |
| C50                                | 0.035 (4)   | 0.029 (4)   | 0.036 (5)   | 0.005 (3)    | -0.013 (3)   | -0.012 (3)   |
| Cl51                               | 0.0550 (14) | 0.0305 (17) | 0.0339 (14) | -0.0037 (12) | -0.0189 (10) | -0.0052 (11) |
| Cl52                               | 0.0403 (16) | 0.054 (3)   | 0.072 (3)   | -0.0155 (16) | 0.0152 (16)  | -0.0206 (18) |
| Cl53                               | 0.0345 (10) | 0.0386 (14) | 0.0407 (16) | -0.0073 (9)  | -0.0034 (10) | -0.0086 (11) |
| <i>Geometric parameters (Å, °)</i> |             |             |             |              |              |              |
| C1—C10                             | 1.3813 (17) |             | C21—C31     | 1.5217 (17)  |              |              |
| C1—C2                              | 1.4276 (17) |             | C22—C23     | 1.3852 (17)  |              |              |
| C1—C11                             | 1.5184 (16) |             | C23—C24     | 1.4084 (18)  |              |              |
| C2—C3                              | 1.3844 (17) |             | C23—H23     | 0.977 (15)   |              |              |

|                     |                     |
|---------------------|---------------------|
| C2—C22 1.4848 (17)  | C24—C29 1.4170 (17) |
| C3—C4 1.4093 (18)   | C24—C25 1.4239 (18) |
| C3—H3 0.947 (15)    | C25—C26 1.3647 (19) |
| C4—C9 1.4168 (18)   | C25—H25 0.961 (15)  |
| C4—C5 1.4251 (17)   | C26—C27 1.4140 (19) |
| C5—C6 1.3650 (19)   | C26—H26 0.963 (16)  |
| C5—H5 0.983 (16)    | C27—C28 1.3654 (19) |
| C6—C7 1.412 (2)     | C27—H27 0.982 (16)  |
| C6—H6 0.971 (16)    | C28—C29 1.4176 (18) |
| C7—C8 1.3663 (19)   | C28—H28 0.953 (16)  |
| C7—H7 0.974 (17)    | C29—C30 1.4088 (18) |
| C8—C9 1.4228 (18)   | C30—H30 0.972 (15)  |
| C8—H8 0.995 (16)    | C31—C35 1.5531 (16) |
| C9—C10 1.4111 (17)  | C31—C32 1.5536 (18) |
| C10—H10 0.988 (15)  | C32—C33 1.5353 (17) |
| C11—C15 1.5492 (17) | C32—H32A 0.970 (15) |
| C11—C12 1.5556 (17) | C32—H32B 0.998 (15) |
| C11—C31 1.5986 (17) | C33—C34 1.5161 (18) |
| C12—C13 1.5280 (18) | C33—C36 1.5790 (17) |
| C12—H12A 0.994 (15) | C34—H34A 0.988 (17) |
| C12—H12B 0.993 (15) | C34—H34B 0.983 (17) |
| C13—C14 1.5175 (18) | C34—H34C 0.967 (17) |
| C13—C36 1.5714 (17) | C35—C36 1.5275 (18) |
| C13—C16 1.5788 (17) | C35—H35A 0.991 (15) |
| C14—H14A 0.949 (18) | C35—H35B 0.973 (15) |
| C14—H14B 1.003 (17) | C36—C37 1.5216 (16) |

|                        |                         |
|------------------------|-------------------------|
| C14—H14C 0.990 (17)    | C37—H37A 1.008 (17)     |
| C15—C16 1.5297 (16)    | C37—H37B 0.948 (17)     |
| C15—H15A 0.999 (15)    | C37—H37C 1.019 (17)     |
| C15—H15B 0.974 (15)    | C40—C143 1.753 (3)      |
| C16—C17 1.5186 (18)    | C40—C142 1.760 (3)      |
| C16—C33 1.5697 (18)    | C40—C141 1.765 (2)      |
| C17—H17A 0.977 (17)    | C40—H40 0.96 (2)        |
| C17—H17B 0.960 (18)    | C50—C151 1.737 (8)      |
| C17—H17C 0.936 (17)    | C50—C152 1.744 (10)     |
| C21—C30 1.3800 (18)    | C50—C153 1.771 (8)      |
| C21—C22 1.4256 (16)    | C50—H50 0.97 (8)        |
| C10—C1—C2 118.40 (11)  | C22—C23—C24 122.63 (11) |
| C10—C1—C11 118.31 (11) | C22—C23—H23 119.8 (9)   |
| C2—C1—C11 123.27 (11)  | C24—C23—H23 117.5 (9)   |
| C3—C2—C1 118.90 (11)   | C23—C24—C29 118.44 (11) |
| C3—C2—C22 120.79 (11)  | C23—C24—C25 122.33 (12) |
| C1—C2—C22 120.31 (10)  | C29—C24—C25 119.23 (12) |
| C2—C3—C4 122.80 (12)   | C26—C25—C24 120.37 (12) |
| C2—C3—H3 118.3 (9)     | C26—C25—H25 122.6 (9)   |
| C4—C3—H3 118.8 (9)     | C24—C25—H25 117.0 (9)   |
| C3—C4—C9 118.37 (11)   | C25—C26—C27 120.40 (12) |
| C3—C4—C5 122.36 (12)   | C25—C26—H26 119.3 (9)   |
| C9—C4—C5 119.28 (12)   | C27—C26—H26 120.3 (9)   |
| C6—C5—C4 120.24 (13)   | C28—C27—C26 120.42 (13) |
| C6—C5—H5 121.7 (9)     | C28—C27—H27 118.4 (9)   |
| C4—C5—H5 118.0 (9)     | C26—C27—H27 121.2 (9)   |

|                         |                          |
|-------------------------|--------------------------|
| C5—C6—C7 120.40 (12)    | C27—C28—C29 120.76 (13)  |
| C5—C6—H6 120.9 (10)     | C27—C28—H28 122.0 (9)    |
| C7—C6—H6 118.7 (10)     | C29—C28—H28 117.2 (9)    |
| C8—C7—C6 120.84 (13)    | C30—C29—C24 118.24 (11)  |
| C8—C7—H7 118.2 (10)     | C30—C29—C28 122.92 (12)  |
| C6—C7—H7 120.9 (10)     | C24—C29—C28 118.83 (11)  |
| C7—C8—C9 120.19 (13)    | C21—C30—C29 123.21 (11)  |
| C7—C8—H8 123.1 (9)      | C21—C30—H30 121.1 (9)    |
| C9—C8—H8 116.7 (9)      | C29—C30—H30 115.6 (9)    |
| C10—C9—C4 118.24 (11)   | C21—C31—C35 111.31 (10)  |
| C10—C9—C8 122.75 (12)   | C21—C31—C32 112.27 (10)  |
| C4—C9—C8 119.00 (11)    | C35—C31—C32 97.66 (9)    |
| C1—C10—C9 123.17 (12)   | C21—C31—C11 115.84 (9)   |
| C1—C10—H10 120.7 (9)    | C35—C31—C11 108.98 (9)   |
| C9—C10—H10 116.1 (9)    | C32—C31—C11 109.24 (10)  |
| C1—C11—C15 110.72 (9)   | C33—C32—C31 102.48 (10)  |
| C1—C11—C12 112.34 (10)  | C33—C32—H32A 113.6 (9)   |
| C15—C11—C12 97.69 (10)  | C31—C32—H32A 114.5 (9)   |
| C1—C11—C31 116.32 (10)  | C33—C32—H32B 109.8 (8)   |
| C15—C11—C31 109.00 (10) | C31—C32—H32B 111.2 (8)   |
| C12—C11—C31 109.16 (9)  | H32A—C32—H32B 105.3 (12) |
| C13—C12—C11 102.55 (10) | C34—C33—C32 113.21 (11)  |
| C13—C12—H12A 114.8 (8)  | C34—C33—C16 118.00 (11)  |
| C11—C12—H12A 113.9 (8)  | C32—C33—C16 109.81 (9)   |
| C13—C12—H12B 111.2 (8)  | C34—C33—C36 118.75 (10)  |
| C11—C12—H12B 109.5 (8)  | C32—C33—C36 104.45 (10)  |

|                          |                           |
|--------------------------|---------------------------|
| H12A—C12—H12B 104.9 (12) | C16—C33—C36 89.86 (9)     |
| C14—C13—C12 113.41 (11)  | C33—C34—H34A 112.8 (10)   |
| C14—C13—C36 117.88 (10)  | C33—C34—H34B 115.0 (10)   |
| C12—C13—C36 110.03 (10)  | H34A—C34—H34B 102.7 (13)  |
| C14—C13—C16 118.37 (11)  | C33—C34—H34C 111.9 (10)   |
| C12—C13—C16 104.56 (9)   | H34A—C34—H34C 106.0 (13)  |
| C36—C13—C16 89.80 (9)    | H34B—C34—H34C 107.7 (13)  |
| C13—C14—H14A 115.2 (10)  | C36—C35—C31 102.87 (10)   |
| C13—C14—H14B 112.3 (9)   | C36—C35—H35A 110.1 (9)    |
| H14A—C14—H14B 103.9 (14) | C31—C35—H35A 108.8 (8)    |
| C13—C14—H14C 110.2 (10)  | C36—C35—H35B 114.6 (9)    |
| H14A—C14—H14C 107.7 (13) | C31—C35—H35B 114.3 (8)    |
| H14B—C14—H14C 106.9 (13) | H35A—C35—H35B 106.1 (12)  |
| C16—C15—C11 102.81 (9)   | C37—C36—C35 113.13 (11)   |
| C16—C15—H15A 111.0 (8)   | C37—C36—C13 118.07 (10)   |
| C11—C15—H15A 108.8 (8)   | C35—C36—C13 109.89 (10)   |
| C16—C15—H15B 115.4 (8)   | C37—C36—C33 118.63 (11)   |
| C11—C15—H15B 115.2 (8)   | C35—C36—C33 104.27 (9)    |
| H15A—C15—H15B 103.8 (11) | C13—C36—C33 90.13 (9)     |
| C17—C16—C15 113.31 (10)  | C36—C37—H37A 112.1 (9)    |
| C17—C16—C33 117.83 (11)  | C36—C37—H37B 114.0 (10)   |
| C15—C16—C33 110.06 (10)  | H37A—C37—H37B 106.1 (13)  |
| C17—C16—C13 118.51 (11)  | C36—C37—H37C 110.8 (9)    |
| C15—C16—C13 104.18 (10)  | H37A—C37—H37C 108.4 (13)  |
| C33—C16—C13 90.20 (9)    | H37B—C37—H37C 105.1 (13)  |
| C16—C17—H17A 111.0 (10)  | C143—C40—C142 110.34 (15) |

|                           |                              |
|---------------------------|------------------------------|
| C16—C17—H17B 112.1 (10)   | Cl43—C40—Cl41 110.22 (13)    |
| H17A—C17—H17B 106.5 (13)  | Cl42—C40—Cl41 110.67 (14)    |
| C16—C17—H17C 112.1 (10)   | Cl43—C40—H40 109.0 (13)      |
| H17A—C17—H17C 108.0 (14)  | Cl42—C40—H40 107.4 (13)      |
| H17B—C17—H17C 106.7 (14)  | Cl41—C40—H40 109.2 (13)      |
| C30—C21—C22 118.43 (11)   | Cl51—C50—Cl52 109.2 (5)      |
| C30—C21—C31 118.24 (10)   | Cl51—C50—Cl53 111.6 (5)      |
| C22—C21—C31 123.33 (11)   | Cl52—C50—Cl53 109.7 (5)      |
| C23—C22—C21 119.01 (11)   | Cl51—C50—H50 107 (4)         |
| C23—C22—C2 120.32 (11)    | Cl52—C50—H50 112 (4)         |
| C21—C22—C2 120.67 (11)    | Cl53—C50—H50 107 (4)         |
| C10—C1—C2—C3 -3.58 (18)   | C26—C27—C28—C29 0.4 (2)      |
| C11—C1—C2—C3 174.86 (11)  | C23—C24—C29—C30 -1.28 (18)   |
| C10—C1—C2—C22 176.55 (11) | C25—C24—C29—C30 179.76 (11)  |
| C11—C1—C2—C22 -5.01 (18)  | C23—C24—C29—C28 178.75 (11)  |
| C1—C2—C3—C4 2.18 (19)     | C25—C24—C29—C28 -0.21 (18)   |
| C22—C2—C3—C4 -177.95 (11) | C27—C28—C29—C30 179.82 (13)  |
| C2—C3—C4—C9 1.16 (19)     | C27—C28—C29—C24 -0.22 (19)   |
| C2—C3—C4—C5 -178.89 (12)  | C22—C21—C30—C29 1.05 (19)    |
| C3—C4—C5—C6 -179.85 (12)  | C31—C21—C30—C29 -178.35 (11) |
| C9—C4—C5—C6 0.10 (19)     | C24—C29—C30—C21 0.68 (19)    |
| C4—C5—C6—C7 1.2 (2)       | C28—C29—C30—C21 -179.35 (12) |
| C5—C6—C7—C8 -0.8 (2)      | C30—C21—C31—C35 52.89 (15)   |
| C6—C7—C8—C9 -0.9 (2)      | C22—C21—C31—C35 -126.49 (12) |
| C3—C4—C9—C10 -2.99 (18)   | C30—C21—C31—C32 -55.43 (14)  |
| C5—C4—C9—C10 177.06 (12)  | C22—C21—C31—C32 125.19 (12)  |



|                              |                              |
|------------------------------|------------------------------|
| C3—C4—C9—C8 178.23 (12)      | C30—C21—C31—C11 178.12 (10)  |
| C5—C4—C9—C8 -1.72 (18)       | C22—C21—C31—C11 -1.25 (17)   |
| C7—C8—C9—C10 -176.61 (13)    | C1—C11—C31—C21 2.09 (15)     |
| C7—C8—C9—C4 2.1 (2)          | C15—C11—C31—C21 128.08 (10)  |
| C2—C1—C10—C9 1.76 (19)       | C12—C11—C31—C21 -126.29 (11) |
| C11—C1—C10—C9 -176.76 (11)   | C1—C11—C31—C35 128.51 (11)   |
| C4—C9—C10—C1 1.57 (19)       | C15—C11—C31—C35 -105.50 (11) |
| C8—C9—C10—C1 -179.70 (12)    | C12—C11—C31—C35 0.13 (13)    |
| C10—C1—C11—C15 54.31 (15)    | C1—C11—C31—C32 -125.87 (10)  |
| C2—C1—C11—C15 -124.14 (12)   | C15—C11—C31—C32 0.13 (12)    |
| C10—C1—C11—C12 -53.76 (15)   | C12—C11—C31—C32 105.76 (11)  |
| C2—C1—C11—C12 127.80 (12)    | C21—C31—C32—C33 166.63 (9)   |
| C10—C1—C11—C31 179.43 (10)   | C35—C31—C32—C33 49.79 (11)   |
| C2—C1—C11—C31 0.99 (17)      | C11—C31—C32—C33 -63.45 (11)  |
| C1—C11—C12—C13 166.02 (10)   | C31—C32—C33—C34 -161.83 (10) |
| C15—C11—C12—C13 49.82 (11)   | C31—C32—C33—C16 63.96 (12)   |
| C31—C11—C12—C13 -63.42 (12)  | C31—C32—C33—C36 -31.21 (11)  |
| C11—C12—C13—C14 -161.50 (10) | C17—C16—C33—C34 0.10 (16)    |
| C11—C12—C13—C36 64.07 (12)   | C15—C16—C33—C34 -131.90 (11) |
| C11—C12—C13—C16 -31.15 (12)  | C13—C16—C33—C34 122.90 (11)  |
| C1—C11—C15—C16 -167.47 (10)  | C17—C16—C33—C32 131.86 (11)  |
| C12—C11—C15—C16 -50.01 (11)  | C15—C16—C33—C32 -0.15 (14)   |
| C31—C11—C15—C16 63.37 (12)   | C13—C16—C33—C32 -105.34 (10) |
| C11—C15—C16—C17 161.65 (11)  | C17—C16—C33—C36 -122.81 (11) |
| C11—C15—C16—C33 -64.03 (12)  | C15—C16—C33—C36 105.18 (10)  |
| C11—C15—C16—C13 31.48 (12)   | C13—C16—C33—C36 -0.01 (8)    |

|                              |                              |
|------------------------------|------------------------------|
| C14—C13—C16—C17 0.27 (17)    | C21—C31—C35—C36 -167.71 (10) |
| C12—C13—C16—C17 -127.09 (12) | C32—C31—C35—C36 -50.13 (11)  |
| C36—C13—C16—C17 122.24 (12)  | C11—C31—C35—C36 63.31 (12)   |
| C14—C13—C16—C15 127.26 (12)  | C31—C35—C36—C37 161.74 (11)  |
| C12—C13—C16—C15 -0.10 (13)   | C31—C35—C36—C13 -63.94 (12)  |
| C36—C13—C16—C15 -110.76 (10) | C31—C35—C36—C33 31.49 (12)   |
